1 **A Novel Family of RNA-Binding Proteins Regulate Polysaccharide Metabolism in**  
2 ***Bacteroides thetaiotaomicron***

3 Amanda N.D. Adams<sup>a</sup>, Muhammad S. Azam<sup>a,b</sup>, Zachary A. Costliow<sup>a,c</sup>, Xiangqian Ma<sup>a</sup>,  
4 Patrick H. Degnan<sup>d#</sup> and Carin K. Vanderpool<sup>a#</sup>

5  
6 <sup>a</sup>Department of Microbiology, University of Illinois Urbana-Champaign, Urbana, Illinois, USA

7 <sup>b</sup>Present address: Department of Microbiology, University of Chicago, Chicago, Illinois, USA

8 <sup>c</sup>Present address: The Broad Institute of MIT and Harvard, Cambridge, Massachusetts, USA

9 <sup>d</sup>Department of Microbiology and Plant Pathology, University of California-Riverside, Riverside,  
10 California, USA

11 #Correspondence to: Patrick H. Degnan, [patrickd@ucr.edu](mailto:patrickd@ucr.edu); or Carin K. Vanderpool,  
12 [cvanderp@illinois.edu](mailto:cvanderp@illinois.edu)

13 **Running Title:** *Bacteroides* RBPs regulate polysaccharide metabolism

14

15

16 **Abstract**

17 Human gut microbiome composition is constantly changing, and diet is a major driver of  
18 these changes. Gut microbial species that persist in mammalian hosts for long periods  
19 of time must possess mechanisms for sensing and adapting to nutrient shifts to avoid  
20 being outcompeted. Global regulatory mechanisms mediated by RNA-binding proteins  
21 (RBPs) that govern responses to nutrient shifts have been characterized in  
22 Proteobacteria and Firmicutes but remain undiscovered in the Bacteroidetes. Here we  
23 report the identification of RBPs that are broadly distributed across the Bacteroidetes,  
24 with many genomes encoding multiple copies. Genes encoding these RBPs are highly  
25 expressed in many *Bacteroides* species. A purified RBP, RbpB, from *Bacteroides*  
26 *thetaiotaomicron* binds to single-stranded RNA *in vitro* with an affinity similar to other  
27 characterized regulatory RBPs. *B. thetaiotaomicron* mutants lacking RBPs show  
28 dramatic shifts in expression of polysaccharide utilization and capsular polysaccharide  
29 loci, suggesting that these RBPs may act as global regulators of polysaccharide  
30 metabolism. A *B. thetaiotaomicron*  $\Delta rbpB$  mutant shows a growth defect on dietary  
31 sugars belonging to the raffinose family of oligosaccharides (RFOs). The  $\Delta rbpB$  mutant  
32 had reduced expression of *BT1871*, encoding a predicted RFO-degrading melibiase,  
33 compared to the wild-type strain. Mutation of *BT1871* confirmed that the enzyme it  
34 encodes is essential for growth on melibiose and promotes growth on the RFOs  
35 raffinose and stachyose. Our data reveal that RbpB is required for optimal expression of  
36 *BT1871* and other polysaccharide-related genes, suggesting that we have identified an  
37 important new family of global regulatory proteins in the Bacteroidetes.

38

39 **Importance**

40 The human colon houses hundreds of bacterial species, including many belonging to  
41 the genus *Bacteroides*, that aid in breaking down our food to keep us healthy.  
42 *Bacteroides* have many genes responsible for breaking down different dietary  
43 carbohydrates and complex regulatory mechanisms ensure that specific genes are only  
44 expressed when the right carbohydrates are available. In this study, we discovered that  
45 *Bacteroides* use a family of RNA-binding proteins as global regulators to coordinate  
46 expression of carbohydrate utilization genes. The ability to turn different carbohydrate  
47 utilization genes on and off in response to changing nutrient conditions is critical for  
48 *Bacteroides* to live successfully in the gut, and thus the new regulators we have  
49 identified may be important for life in the host.

50

51 **Key words** RRM-1, RNA-binding protein, Hfq, melibiose, PUL, CPS

52

53

## 54 **Introduction**

55           The human gut microbiome is an important player in host health, with diet being  
56 one of the principal drivers of gut microbial composition and function (1–3). Dietary  
57 carbohydrates, including complex polysaccharides and oligosaccharides are not readily  
58 absorbed by the host and reach the distal gut where they are broken down and  
59 metabolized by a consortium of microbes with diverse enzymatic capabilities (4).  
60 Members of the dominant bacterial phylum Bacteroidetes can readily switch between  
61 carbohydrate types as they become available due to dozens of substrate-specific  
62 polysaccharide utilization loci (PUL) that encode proteins responsible for sensing and  
63 catabolizing diverse polysaccharides (5–7). Characterized PULs are tightly regulated by  
64 several distinct families of transcriptional regulators so that they are only abundantly  
65 expressed when their substrates are available (5, 8–17). However, accumulating  
66 evidence suggests that post-transcriptional regulation also plays an important part in gut  
67 colonization and preferential use of carbohydrates through control of PULs (18–20).

68           Post-transcriptional regulation can be mediated by multiple regulators. In  
69 *Bacteroides* species, the roles of small RNA (sRNA) regulators (19, 21) and other RNA  
70 regulatory elements like riboswitches (22–24) in control of carbohydrate and vitamin  
71 metabolism are beginning to be recognized. In well-studied Firmicutes and  
72 Proteobacteria, post-transcriptional regulation of carbon metabolism and other systems  
73 often occurs through the actions of sRNAs and their helper RNA chaperones (25).  
74 Three of the most well-studied RNA chaperones include Hfq, CsrA, and ProQ.  
75 Collectively, these three RNA-binding proteins (RBPs) regulate the bulk of the RNA  
76 regulatory interactome in organisms like *Escherichia coli* and *Salmonella enterica*, and

77 each RBP has its own distinct RNA targets (26, 27). Hfq in particular functions as a  
78 global post-transcriptional regulator of gene expression (28, 29). It binds to both mRNAs  
79 and sRNAs, facilitating their interactions through short stretches of complementarity (30,  
80 31). These interactions result in a variety of different regulatory outcomes, primarily  
81 resulting from changes in translation initiation or mRNA stability (28). In many  
82 organisms, mutation of *hfq* causes global changes in gene expression and pleiotropic  
83 phenotypes (32–34).

84         Though regulatory RNA chaperones have not been characterized in the  
85 Bacteroidetes, post-transcriptional regulation has been implicated in control of gene  
86 expression in *Bacteroides* species (21, 35), including regulation of PUL expression (19).  
87 In particular, the cis-antisense PUL-associated sRNA DonS in *B. fragilis* as well as  
88 several PUL-associated cis-antisense sRNAs in *B. thetaiotaomicron* (19, 21) have been  
89 implicated in modulation of PUL function through repression of carbohydrate transporter  
90 gene expression. A recent study identified dozens of sRNAs encoded throughout the  
91 genome of *B. thetaiotaomicron* with many being PUL-associated, suggesting that  
92 sRNA-mediated regulation of PUL function may be a common phenomenon in  
93 *Bacteroides* (21). Additionally, there are a growing number of examples of regulatory  
94 effects in *Bacteroides* mediated by sequences in mRNA untranslated regions (UTRs)  
95 (18, 36) and these may be mediated by as yet unidentified sRNAs or RNA chaperones.  
96 To better understand the scope of RNA-mediated regulatory mechanisms in the  
97 Bacteroidetes, we sought to identify and characterize RBPs that may act as regulatory  
98 RNA chaperones.

99           Here we report the identification of a family of genes commonly found in  
100 Bacteroidetes genomes, which encode RBPs with a single RNA Recognition Motif 1  
101 (RRM-1) domain. These genes are conserved, often exist in multiple copies per  
102 genome, and are highly expressed in many human gut *Bacteroides* isolates. We  
103 demonstrate that a member of this family, RbpB, is a single-stranded (ss) RNA-binding  
104 protein that binds with some specificity and affinities similar to other characterized RNA  
105 chaperones. *B. thetaiotaomicron* mutants lacking one or more of these RBPs have  
106 large-scale changes to their transcriptomes compared to the wild-type strain, with genes  
107 belonging to PUL and capsular polysaccharide (CPS) loci being the most differentially  
108 regulated. *B. thetaiotaomicron rbpB* mutants have growth defects on the common  
109 dietary plant sugars raffinose family oligosaccharides due to decreased expression of  
110 *BT1871*, an essential melibiase encoded in PUL24. Our findings suggest that this family  
111 of RBPs play an important role in global regulation of polysaccharide metabolism in  
112 *Bacteroides*.

113

## 114 **Results**

### 115 **Identification of a conserved family of RNA-binding proteins in the phylum**

#### 116 **Bacteroidetes**

117           To identify putative RNA-binding proteins that may act as global regulators in the  
118 Bacteroidetes, we compared a set of 313 human gut-associated microbial genomes  
119 representing major phyla commonly found in gut microbial communities (37). We first  
120 searched for canonical RNA chaperones – Hfq, ProQ, and CsrA, which are involved in  
121 post-transcriptional regulation of gene expression in Proteobacteria. Using hidden

122 Markov models (HMMs) with trusted cutoffs, we identified Hfq in 23% (72/313) of the  
123 genomes (a total of 79 Hfq homologs) mostly in the Proteobacteria, although there were  
124 some identified in Firmicutes genomes (Fig.1A and Dataset S1). ProQ homologs (a total  
125 of 40 across 36 genomes) were entirely restricted to the Proteobacteria, with the  
126 majority being found in  $\gamma$ -proteobacterial genomes. CsrA homologs were identified in  
127 25% (79/313) of genomes with a total of 93 CsrA homologs distributed across the  
128 Proteobacteria and Firmicutes. We did not identify any Hfq, ProQ, or CsrA homologs  
129 among Bacteroidetes genomes suggesting that if RNA chaperone regulators are  
130 present in this phylum, they do not belong to these canonical families.

131 To identify other putative RNA chaperones in our model organism, we searched  
132 the *B. thetaiotaomicron* VPI-5482 genome for proteins with conserved RNA-binding  
133 domains. This yielded three intriguing candidates comprised of a single RNA  
134 Recognition Motif 1 (RRM-1; PF00076) domain, here named RbpA (BT0784), RbpB  
135 (BT1887), and RbpC (BT3840). The small, ~70 amino acid RRM-1 domain is one of the  
136 most common RNA-binding domains in eukaryotes where it is typically found in  
137 multidomain proteins involved in post-transcriptional RNA processing events including  
138 regulation of RNA stability, translation, and turnover (38). Though poorly characterized,  
139 many bacterial genomes appear to encode RRM-1 domain-containing proteins (39, 40).  
140 Given the characterized roles of RRM-1 domain-containing proteins in post-  
141 transcriptional RNA regulatory processes, we chose to focus on these homologs for  
142 further characterization.

143 Expanding our search for RRM-1 domain-containing proteins to our larger set of  
144 gut microbial genomes identified homologs of *B. thetaiotaomicron* RBPs in 69 of 313

145 genomes (Fig. 1A and Dataset S1). These proteins were widely distributed among  
146 Bacteroidetes genomes accounting for 86% (149/174) of the total number of RRM-1  
147 domain proteins identified. We also identified homologs in a small subset of  
148 Proteobacterial genomes (Fig. 1A, Dataset S1). In contrast to eukaryotes, the bacterial  
149 RRM-1 proteins we identified are small, single-domain proteins ranging in size from 60-  
150 132 amino acids (aa), with the majority being 80-100 aa. Each protein contains a single  
151 ferredoxin-like fold RRM-1 motif followed by a predicted disordered C-terminus of  
152 varying lengths. This structure is reminiscent of the disordered C-termini of Hfq and  
153 other RNA chaperones that plays a role in RNA-binding and cycling among various  
154 binding partners (41–45). CsrA, Hfq, and ProQ homologs were largely encoded in single  
155 copy with only a few instances of more than one copy in individual genomes (Dataset  
156 S1). In contrast, RRM-1 genes frequently occurred in multiple copies per genome in  
157 Bacteroidetes genomes (Table S1, Fig. 1B). Of the Bacteroidetes genomes we  
158 analyzed, 50 of 58 contained one to four copies of genes encoding RRM-1 domain  
159 proteins, with the majority of genomes containing three (Fig. 1B).

160 To analyze phylogenetic relationships among novel RRM-1 domain proteins  
161 found in Bacteroidetes genomes, we used MCL (Markov cluster algorithm) with a 70%  
162 amino acid identity cutoff and compared the resulting clusters to a species phylogeny of  
163 the Bacteroidetes (Dataset S1). Clustering was chosen because the extent of  
164 divergence among the homologs and their short lengths makes phylogenetic  
165 reconstruction unreliable. The clustering revealed a complicated history of divergence  
166 and duplication resulting in 10 clusters designated *rbpA*–*rbpJ*. It is notable that the three  
167 loci represented in *B. thetaiotaomicron*, *rbpA*, *rbpB*, and *rbpC* represent the most



168 widespread clusters. Even within these clusters we identified evidence of likely  
169 duplications or horizontal gene transfer among particular lineages, resulting in genomes  
170 that encode two genes belonging to a single cluster. For example, the *Bacteroides*  
171 *fragilis* 3\_1\_2 genome contains *rbpA* and *rbpA'* which share 84% amino acid identity.

172 The well-characterized RNA chaperone Hfq is an abundant protein in  
173 Proteobacteria (46). To determine whether genes encoding *Bacteroides* RBPs show  
174 similarly high levels of expression, we analyzed available RNA-seq data for *B.*  
175 *thetaiotaomicron* (generated by us (see Materials and Methods) and others (23)) and  
176 eight additional species – *Bacteroides caccae* (47), *Bacteroides cellulosyliticus* (48),  
177 *Bacteroides dorei* (49), *Bacteroides massilensis* (18), *Bacteroides uniformis* (24),  
178 *Bacteroides vulgatus* (24), and *Bacteroides xylanisolvens* (50) that were grown under a  
179 variety of *in vitro* conditions. Virtually all of the genes encoding RBP homologs were  
180 highly expressed in these datasets. Most *Bacteroides rbp* genes (represented by  
181 colored triangles, Fig. 1C, 1D) were expressed at levels placing them among the top  
182 10% of most highly expressed genes (represented by grey dots, Fig. 1C, 1D). Looking  
183 specifically at *B. thetaiotaomicron rbpA*, *rbpB*, and *rbpC*, we observed that these genes  
184 are highly expressed both *in vitro* (minimal medium with glucose and TYG medium) and  
185 *in vivo* in monocolonized mice (51) or mice colonized with a synthetic consortium (47)  
186 (Fig. 1D).

### 187 ***B. thetaiotaomicron* RbpB is a single-stranded RNA-binding protein**

188 To test the RNA-binding activity of a representative of this family of *Bacteroides*  
189 RBPs, we conducted electrophoretic mobility shift assays (EMSAs). We overexpressed  
190 and purified *B. thetaiotaomicron* RbpB and tested binding to a series of *in vitro*

191 transcribed single-stranded RNA (ssRNA) “pentaprob­es” (52). The twelve ssRNA  
192 pentaprob­es are each 100-nucleotides (nts) in length and collectively contain all  
193 possible 5-nt sequence combinations (Table S1). RbpB shifted ten of the twelve probes  
194 to varying degrees, indicating that RbpB binds ssRNA *in vitro* and suggesting that it  
195 does so with some degree of sequence specificity (Figs. 2A and S1A). RbpB showed no  
196 evidence of binding to two of the pentaprob­es PP6 and PP12 (Figs. S1A and 2B).  
197 Probes PP2 and PP3 shifted at lower concentrations of RbpB compared with other  
198 probes (Figs. 2A and S1A). The calculated  $K_D$  of RbpB binding to PP3 is 10.5  $\mu\text{M}$  (Fig.  
199 2C), a dissociation constant similar to those previously reported for RRM domains (38,  
200 53). RRM domains can interact with a variable number of nts in the binding pocket, with  
201 binding motifs that are typically 5-8 nts in length (54). To identify candidate RbpB  
202 binding motifs in the pentaprob­es, we used MEME motif discovery tool (55) to identify  
203 sequence motifs (<9-nt in length) that occurred in RbpB-binding pentaprob­es but were  
204 absent in non-binding pentaprob­es (Fig. S1B). MEME identified 10 such motifs in RbpB-  
205 binding pentaprobe sequences. Motif 1, comprised of G, U, and A residues was the  
206 most common motif found exclusively in the bound pentaprob­es (Figs. 2D and S1B). A  
207 C/U-rich motif, motif 9 (Fig. 2E and S1B), was present in probes PP2 and PP3, which  
208 bound RbpB with higher affinity than other pentaprob­es (Fig. 2A and C and S1A). To  
209 test whether RbpB would bind specifically to motif 1 (5'-GUAGGAUA-3') or motif 9  
210 (5'UCCUGUGC-3'), we conducted EMSAs using new RNA oligonucleotide probes  
211 containing three repeats of each motif. RbpB shifted the probe containing three copies  
212 of motif 1 with a  $K_D$  of 5.1  $\mu\text{M}$  (Fig. 2D). In contrast, RbpB did not shift a probe  
213 containing three copies of motif 9 (Fig. 2E). Overall, these results demonstrate that

214 RbpB binds ssRNA with some degree of specificity at affinities comparable to known  
215 RNA-binding proteins (56–58).

### 216 **Loss of RBPs leads to altered expression of PUL and CPS loci**

217 To assess possible functions of RBPs in *B. thetaiotaomicron*, we made mutant  
218 strains lacking *rbpA* and *rbpB*. We generated three strains:  $\Delta rbpA$  (BT0784),  $\Delta rbpB$   
219 (BT1887), and  $\Delta rbpA\Delta rbpB$ . We were unable to generate a  $\Delta rbpC$  mutant. We  
220 performed RNA-seq on RNA samples from  $\Delta rbpA$ ,  $\Delta rbpB$ , and  $\Delta rbpA\Delta rbpB$  strains  
221 grown to mid-log or stationary phase in rich medium (TYG). Among protein coding  
222 genes, 12.3% (587/4,778) were significantly differentially regulated (q-value <0.06, log<sub>2</sub>  
223 fold-change of  $\geq +1$  or  $\leq -1$ ) in at least one condition (Dataset S2A), with  $\Delta rbpA\Delta rbpB$   
224 having the greatest number of differentially regulated genes among the three mutants.  
225 To identify functional classes of differentially expressed genes, Gene Set Enrichment  
226 Analysis (GSEA) (59) was used with *B. thetaiotaomicron*-specific custom gene sets (see  
227 Materials and Methods). Differentially regulated genes that were not categorized in  
228 GSEA were further grouped according to Gene Ontology (Dataset S2A and Materials  
229 and Methods). Considering all differentially regulated genes across all strains, enriched  
230 functional groups included CPS loci, PULs, hypothetical proteins, transmembrane  
231 transport, redox activities, B-vitamin metabolism, transcription, translation, and a variety  
232 of other metabolic pathways (Fig. 3A). The largest functional group of differentially  
233 regulated genes was CPS genes, accounting for 17% (98/587) of differentially regulated  
234 genes across all six wild-type to mutant comparisons (Fig. 3A, B). CPS loci encode  
235 functions that produce the polysaccharide coats that surround the *Bacteroides* cell  
236 surface (10, 17, 60). Of the eight CPS loci in *B. thetaiotaomicron* VPI-5482, five were

237 differentially regulated across the three mutant strains including CPS2, CPS4, CPS5,  
238 CPS6, and CPS7 loci (Fig. 3B). CPS4 and 6 loci were downregulated in all three  
239 mutants compared to wild-type in both conditions, whereas CPS2, 5, and 7 loci were  
240 upregulated in some mutants compared to wild-type in a subset of conditions. CPS2  
241 was upregulated in both  $\Delta rbpA$  and  $\Delta rbpB$  mutants in mid-log and stationary phase, but  
242 was unchanged in the  $\Delta rbpA\Delta rbpB$  mutant in either growth condition, implying a genetic  
243 interaction between *rbpA* and *rbpB* in the regulation of the CPS2 locus. Expression  
244 patterns for all mutants were similar between mid-log and stationary phase conditions,  
245 except for the CPS7 locus. CPS7 was upregulated in  $\Delta rbpA$  and  $\Delta rbpA\Delta rbpB$  mutants  
246 compared to wild-type in mid-log cells but only the  $\Delta rbpA\Delta rbpB$  mutant showed a  
247 difference with wild-type in stationary phase.

248 PULs were the second most abundantly represented functional group among  
249 differentially regulated genes (Fig. 3A). Of the 88 annotated PULs (5), 29 (33%) had at  
250 least one differentially regulated gene in *rbp* mutant strains compared to wild-type,  
251 accounting for 29% (75/263) of genes across the 29 PULs (Fig. 3C). In contrast to CPS  
252 expression, PUL expression differences in mutant strains frequently varied according to  
253 growth phase. PUL56 was downregulated in all three mutant strains exclusively during  
254 stationary phase. In contrast, PUL71 was downregulated in all three mutant strains  
255 during stationary phase but in mid-log was only downregulated in single mutants  $\Delta rbpA$   
256 and  $\Delta rbpB$  (Fig. 3C). Similar to the CPS loci, several PULs demonstrated expression  
257 patterns indicative of a genetic interaction between *rbpA* and *rbpB*, including PUL22.  
258 PUL22 was upregulated in the  $\Delta rbpB$  mutant but downregulated in  $\Delta rbpA\Delta rbpB$  double  
259 mutant during mid-log growth. In contrast, in stationary phase, PUL22 was upregulated

260 in  $\Delta rbpA$  and downregulated in  $\Delta rbpB$  and  $\Delta rbpA\Delta rbpB$  mutant strains. Several PULs  
261 including PUL08, 10, 14, 51, 59, 75, 80, and 81, were differentially regulated in specific  
262 single mutant strains but not differentially regulated in the  $\Delta rbpA\Delta rbpB$  double mutant.  
263 We also saw some expression patterns that may be indicative of redundant regulation  
264 by RbpA and RbpB – PULs 36, 45, 54, 72, 73, and 82 were not differentially expressed  
265 in the single deletion mutants but were differentially expressed in the  $\Delta rbpA\Delta rbpB$   
266 double mutant. Collectively, these results suggest that RbpA and RbpB play global roles  
267 in *B. thetaiotaomicron* gene expression, and in particular suggest that they coordinate  
268 capsular polysaccharide production and carbohydrate utilization through control of CPS  
269 and PUL genes, respectively.

#### 270 **The $\Delta rbpB$ mutant is defective for growth on raffinose family oligosaccharides**

271 To determine whether *B. thetaiotaomicron* RBPs are required for growth on  
272 specific carbohydrates, we carried out an initial screen of  $\Delta rbpA$ ,  $\Delta rbpB$ , and  
273  $\Delta rbpA\Delta rbpB$  strains for growth defects on Biolog plates containing a variety of carbon  
274 sources (Fig. S2 and Dataset S3). All three strains were defective for utilization of a  
275 number of dietary and host-associated glycans (Fig. S2 and Dataset S3). As observed  
276 for the transcriptome, phenotypes for the double mutant  $\Delta rbpA\Delta rbpB$  strain did not  
277 recapitulate all growth defects observed in single mutant  $\Delta rbpA$  or  $\Delta rbpB$  strains,  
278 implying a genetic interaction between *rbpA* and *rbpB*. For example, the  $\Delta rbpA$  strain  
279 showed faster growth than the wild-type strain on maltotriose,  $\alpha$ -methyl-D-galactoside,  
280  $\alpha$ -D-lactose, and lactulose while showing slower growth on sucrose, D-trehalose,  
281 turanose, D-mannose, and palatinose as compared to wild-type. Defects on turanose,  
282 D-trehalose, and palatinose were recapitulated in the  $\Delta rbpA\Delta rbpB$  strain, but the other

283 growth changes seen in the  $\Delta rbpA$  strain were not observed in the  $\Delta rbpA\Delta rbpB$  strain.  
284 The  $\Delta rbpB$  strain grew slower than wild-type on D-melibiose,  $\beta$ -methyl-D-galactoside,  
285 palatinose, and mannan, and defects on  $\beta$ -methyl-D-galactoside, palatinose, and  
286 mannan were also observed for the  $\Delta rbpA\Delta rbpB$  strain. Interestingly, all three strains  
287 were defective for growth on palatinose and a methylated galactoside. Unique to  
288  $\Delta rbpA\Delta rbpB$  was slow growth on gentiobiose and N-acetyl-D-galactosamine. Overall,  
289 these results are consistent with transcriptome results that suggest that both *rbpA* and  
290 *rbpB* play a role in regulation of carbohydrate utilization.

291 One of the carbohydrates on which the  $\Delta rbpB$  mutant alone had substantial  
292 growth defects was D-melibiose, a subunit of the raffinose family oligosaccharides  
293 (RFOs) (Fig. S2). Since RFOs are prevalent in the human diet and are available to  
294 organisms that can metabolize them in the distal gut, we chose this phenotype for  
295 further evaluation. RFOs consist of the disaccharide sucrose ( $\alpha$ -1,2-glucose-fructose)  
296 bound to repeating  $\alpha$ -1,6-galactosyl residues producing the trisaccharide raffinose and  
297 the tetrasaccharide stachyose (Fig. 4A), along with the pentasaccharide verbascose. In  
298 addition to sucrose, the  $\alpha$ -1,6-galactose-glucose disaccharide melibiose is an RFO  
299 subunit. When grown in minimal medium with RFOs or their subunits as the sole carbon  
300 source, the  $\Delta rbpB$  strain displayed growth defects on melibiose, raffinose, and  
301 stachyose (Fig. 4B). The doubling time of the wild-type strain on minimal medium with  
302 melibiose as the sole carbon source was 2.86 hours compared to twice that for the  
303  $\Delta rbpB$  strain (5.76 hours). The  $\Delta rbpA$  and  $\Delta rbpA\Delta rbpB$  strains did not have growth  
304 defects on these substrates, again consistent with possible genetic interactions between  
305 RbpA and RbpB with respect to growth on RFOs.  $\Delta rbpA$ ,  $\Delta rbpB$ , and  $\Delta rbpA\Delta rbpB$

306 strains showed no growth defects on monosaccharide subunits of RFOs, including  
307 glucose, galactose, and fructose, or on the disaccharide sucrose (Fig. 4B-C),  
308 suggesting that the  $\Delta rbpB$  growth defect is due to the inability of this strain to utilize  
309 sugars containing the  $\alpha$ -1,6-galactose-glucose linkage.

310 Complementation of the  $\Delta rbpB$  strain was attempted with two different constructs  
311 (Fig. S3A). Neither complementation construct restored growth of the  $\Delta rbpB$  mutant on  
312 RFOs (Fig. S3B). We measured *rbpB* mRNA levels from wild-type (*rbpB*<sup>+</sup>),  $\Delta rbpB$ , and  
313 both complementation strains and found that levels of *rbpB* mRNA in complementation  
314 strains were significantly lower than in the wild-type strain (Fig. S3C), which may  
315 account for the inability to restore growth on melibiose.

316 Upon further inspection of the *rbpB* (*BT1887*) native locus in our TYG RNA-seq  
317 data, we noticed reduced expression of the immediately adjacent genes *BT1886*,  
318 *BT1885*, and *BT1884* in the  $\Delta rbpB$  strain, especially in mid-log phase, suggesting a  
319 possible polar effect of the *rbpB* mutation on *BT1886-BT1884* (Fig. S4A). We also  
320 observed a single transcription start site upstream of *rbpB-BT1884* in TYG (21), a  
321 terminator prediction after the *rbpB* ORF, and a terminator prediction after *BT1884* (21),  
322 suggesting *rbpB* may be expressed as both a monocistronic mRNA and polycistronic  
323 with *BT1886-BT1884* (Fig. S4B). To determine if we could detect *rbpB* co-transcription  
324 with *BT1886-BT1884* under conditions relevant to the *rbpB* mutant phenotype we  
325 conducted RT-PCR on RNA samples harvested from wild-type (*rbpB*<sup>+</sup>) cells grown to  
326 mid-log phase on minimal media with glucose or melibiose. Primer sets spanning  
327 junctions between each gene in the putative operon yielded PCR products (Fig. S4C),  
328 suggesting that *rbpB* and *BT1886-BT1884* are expressed as an operon. *BT1886*,

329 *BT1885*, and *BT1884* encode a putative RhlE DEAD-box RNA helicase, a hypothetical  
330 protein, and a cold shock domain containing protein, respectively. The operon structure  
331 suggests the functions of these proteins are linked. One other possibility that may  
332 explain the inability to complement the *rbpB* mutant melibiose growth phenotype is that  
333 the appropriate stoichiometry of these proteins was not restored by the  
334 complementation constructs.

### 335 **Loss of RbpB leads to decreased expression of an essential melibiase in PUL24**

336         Given the inability of  $\Delta rbpB$  to utilize  $\alpha$ -1,6 linked RFOs, we hypothesized that a  
337 gene (or genes) encoding an  $\alpha$ -galactosidase would be differentially regulated in the  
338  $\Delta rbpB$  mutant strain compared to wild-type. Although there are several  $\alpha$ -galactosidases  
339 annotated in the genome (7), none of them were significantly differentially regulated in  
340 our TYG RNA-seq, suggesting differential regulation may be specific to growth in  
341 minimal medium with melibiose. We therefore performed more RNA-seq to identify  
342 candidate genes responsible for this phenotype. We compared transcriptome profiles of  
343 wild-type and  $\Delta rbpB$  strains grown in minimal media with glucose or melibiose. To  
344 identify genes that are uniquely transcriptionally responsive to the  $\alpha$ -1,6 linkage in  
345 melibiose, we also compared the glucose- and melibiose-grown cells' transcriptomes to  
346 that of cells grown in minimal medium with a 1:1 mixture of glucose and galactose, the  
347 monosaccharides that makeup melibiose.

348         Comparing wild-type and  $\Delta rbpB$  transcriptomes in all three media, we identified  
349 genes in PUL24 that were strongly differentially regulated (Fig. 5A and Dataset S2B).  
350 PUL24 (genes *BT1871-BT1878*) contains a SusC/D-like pair (BT1874-BT1875), a  
351  $\sigma$ /anti- $\sigma$  factor pair (BT1876-BT1877), and four putative glycosyl hydrolases belonging



352 to families GH3 (BT1872), GH43 (BT1873), GH76 (BT1878), and GH97 (BT1871).  
353 Genes *BT1873-BT1878* were expressed at very low levels in wild-type and  $\Delta rbpB$   
354 strains in all of the conditions we tested (Fig. 5A, Dataset S2B) suggesting that these  
355 genes are not involved in glucose, galactose, or melibiose metabolism. However,  
356 *BT1871* and *BT1872* were highly expressed in the wild-type strain growing in glucose  
357 and melibiose (Fig. 5A) (and the glucose-galactose mixture, Dataset S2B) but were  
358 expressed at barely detectable levels in the  $\Delta rbpB$  strain. In contrast, *BT1871* and  
359 *BT1872* were not differentially expressed between wild-type and  $\Delta rbpB$  strains grown in  
360 TYG (Dataset S2A).

361 Previous work showed that *BT1871* has *in vitro* melibiase activity (61), and  
362 transposon insertions in *BT1871* led to decreased fitness in melibiose in a carbohydrate  
363 utilization screen (62). To confirm that *BT1871* was important for *B. thetaiotaomicron*  
364 utilization of RFOs including melibiose as a sole carbon source, we deleted *BT1871* and  
365 cultured the  $\Delta BT1871$  and wild-type strains in minimal media with melibiose, raffinose,  
366 stachyose, and sucrose (Fig. 5B). The  $\Delta BT1871$  strain showed no growth defect on  
367 sucrose compared to the wild-type strain, which is expected based on its predicted  
368 melibiase activity. In contrast, the  $\Delta BT1871$  mutant could not grow on melibiose,  
369 indicating *BT1871* is essential for melibiose utilization. Additionally, the  $\Delta BT1871$  mutant  
370 showed reduced growth on raffinose and stachyose compared to wild-type (Fig. 5B),  
371 indicating that *BT1871* is required for metabolism of RFOs in general. Residual growth  
372 of the  $\Delta BT1871$  mutant on raffinose and stachyose is presumably due to the ability to  
373 utilize fructose from the  $\alpha$ -1,2 sucrose linkage.

374 We constructed three different complementation strains to confirm that *BT1871* is  
375 responsible for the melibiose growth defect. There is a single predicted promoter  
376 upstream of *BT1872* (21) and the *BT1872* and *BT1871* open reading frames are  
377 separated by only 32 bp suggesting that they are co-expressed. Complementation  
378 strain 1 (compl1, Fig. 5C) carried the native promoter upstream of *BT1872* followed by a  
379 deletion of the *BT1872* ORF and the intact *BT1871* gene. Complementation strain 2  
380 (compl2, Fig. 5C) carried the intact promoter and *BT1872* and *BT1871* genes.  
381 Complementation strain 3 (compl3, Fig. 5C) carried the promoter and *BT1872* only. The  
382 compl1 construct partially restored growth on melibiose, raffinose, and stachyose (Fig.  
383 5D). The compl2 construct improved growth on RFOs compared to the compl1  
384 construct, whereas the compl3 construct (*BT1872* alone) failed to complement (Fig. 5D)  
385 Taken together these results indicate that *BT1871* is an essential melibiase required for  
386 RFO utilization and the decrease in *BT1871* mRNA in the  $\Delta rbpB$  strain is responsible for  
387 the melibiose growth defect.

388

## 389 Discussion

390 Though it is well established that rapid nutrient shifts affect the composition and  
391 metabolic activities of gut microbes (47, 63–65), the regulatory mechanisms that allow  
392 them to sense and rapidly adapt to use of different nutrient sources are poorly  
393 understood. Canonical mechanisms for global transcriptional regulation of carbon  
394 source utilization in model organisms from the phyla Proteobacteria and Firmicutes(66)  
395 are absent in the Bacteroidetes (67–69). Likewise, RNA chaperones and RNA-mediated  
396 post-transcriptional regulatory mechanisms that coordinate metabolism and responses

397 to changing environmental conditions (28, 70–73) are commonly found in  
398 Proteobacteria and Firmicutes but have not been described in Bacteroidetes. In this  
399 study, we identify a family of conserved RNA-binding proteins that is broadly distributed  
400 among members of the Bacteroidetes and some Proteobacteria that lack canonical  
401 RNA chaperone regulators. These RBPs occur in multiple copies in a given genome  
402 and are highly expressed in a number of *Bacteroides* species from the human gut in  
403 culture and in mouse models. At least one of these proteins from *B. thetaiotaomicron*,  
404 RbpB, is able to bind ssRNA *in vitro* in a sequence specific manner. Deletion of *rbpA*  
405 and *rbpB* in *B. thetaiotaomicron* leads to global dysregulation of CPS loci and PULs and  
406 perturbed growth on a variety of carbohydrate sources. Overall, these results suggest  
407 that this family of RBPs may play global regulatory roles in carbohydrate metabolism in  
408 the *Bacteroides*.

409 While our study provides strong evidence for the importance of these RBPs in  
410 global regulation of gene expression, the mechanisms by which RBPs mediate these  
411 effects are still unknown. We hypothesize that RBPs act as RNA chaperones that  
412 control mRNA stability and translation by binding to target mRNAs and modulating  
413 ribosome association or access of RNases (Fig. 6). RBP modulation of mRNA  
414 translation or stability may be through direct interaction of RBPs with target mRNAs  
415 (Fig. 6A) or through facilitating base pairing of sRNAs to mRNAs (Fig. 6B), either of  
416 which could result in changes to mRNA structure that alter accessibility to ribosomes or  
417 RNases. Little is known about RNA chaperone function in the Bacteroidetes, but in the  
418 case of RbpB, its role in RNA metabolism is supported by its genomic location.  
419 Annotations for BT1885 (DEAD-box RNA helicase) and BT1884 (cold-shock protein)

420 suggest that *rbpB-BT1884* may be an RNA metabolism operon. To date, we do not  
421 have evidence supporting or refuting a role for RBPs in modulation of sRNA function.  
422 However, recent literature suggests that sRNAs may play an important role in  
423 modulation of carbohydrate metabolism in *Bacteroides* (19, 21). One recent study  
424 described an N-acetyl-D-glucosamine-inducible sRNA called GibS that binds *in vitro* to  
425 mRNAs involved in carbohydrate metabolism. Mutant strains lacking GibS had nine  
426 differentially-regulated genes compared to the wild-type parent strain. Two of these  
427 were *BT1871-BT1872*, where expression was reduced in the  $\Delta gibS$  compared to the  
428 wild-type strain. GibS binding to *BT1871* mRNA was predicted *in silico* but could not be  
429 demonstrated *in vitro*. The authors speculated that GibS binding to *BT1871* mRNA  
430 required an unidentified RNA chaperone. To test whether RbpB facilitates RFO  
431 utilization by a GibS-dependent mechanism, we generated deletion mutants  $\Delta gibS$  and  
432  $\Delta rbpB\Delta gibS$  and grew these strains alongside wild-type in the presence of melibiose  
433 (Fig. S5A). The  $\Delta gibS$  mutant grew similarly to wild-type and the  $\Delta rbpB\Delta gibS$  mutant  
434 grew similarly to the  $\Delta rbpB$  parent strain on melibiose (Fig. S5A). RT-qPCR showed that  
435 levels of *BT1871* mRNA were also similar between wild-type and  $\Delta gibS$  strains (Fig.  
436 S5B), suggesting that GibS does not play a major role in modulating *BT1871* mRNA  
437 levels in our growth conditions. Overall, these results suggest that under our growth  
438 conditions, RbpB regulates *BT1871* independently of GibS.

439 We have yet to explore the role of RBPs in helping *B. thetaiotaomicron* colonize  
440 or be maintained in the host gut. In a recent study (62) screening transposon (Tn)  
441 mutants for a wide variety of *in vitro* and *in vivo* phenotypes, there were no reported  
442 insertions in *rbpA* or *rbpB*. Insertions in *rbpC* led to reduced fitness on glucose-

443 containing media (62), possibly explaining our inability to generate  $\Delta rbpC$  mutants in our  
444 standard glucose-rich media. The *rbpC* mutants also had an increased growth on  
445 melibiose suggesting that *rbpC* also plays a role in utilization of RFOs. In the same  
446 study (62), colonization of germ-free mice fed a plant polysaccharide-rich diet with the  
447 *B. thetaiotaomicron* Tn-mutant pool led to increased fitness of *rbpC* mutants. *BT1871*  
448 mutants showed decreased fitness over time, whereas Tn-insertions into several other  
449 PUL24 genes led to increased fitness *in vivo*. Overall, these data indicate that RBPs  
450 and the PULs they regulate may be important for *in vivo* fitness.

451         Regulation by RBPs may represent a critical mechanism for coordination of  
452 carbohydrate utilization and production of cell surface capsular polysaccharides.  
453 Differential regulation of PULs and CPS loci in *rbp* deletion strains is consistent with  
454 several reports indicating a regulatory link between these polysaccharide metabolic  
455 processes in *B. thetaiotaomicron* (17, 74, 75). Our RNA-seq data showed that deletion  
456 of RBPs leads to reduced expression of CSP4 and CPS6 and increased expression of  
457 CPS5. In *B. thetaiotaomicron*, CPS4 is normally the most highly expressed locus *in vitro*  
458 and in mouse models when dietary glycans are present (64, 75, 76), and disruption of  
459 CPS4 expression leads to decreased fitness in mouse competitions (77, 78). In a study  
460 monitoring CPS expression in a mouse model over time, it was observed that even  
461 when the *B. thetaiotaomicron* inoculum expressed one dominant CPS locus, expression  
462 over time varied between mice (75). While CPS4 was most often highly expressed in  
463 mice fed a high-fiber diet, mice on fiber-free diets typically expressed CPS5 or CPS6. *B.*  
464 *thetaiotaomicron* mutants that could only express a single CPS locus had a decreased  
465 ability to recover from antibiotic-induced stress (75). These studies along with our

466 present work collectively suggest that the ability to shift among different CPS types is  
467 advantageous in the host and that this regulation may be mediated in part by RBPs.  
468 Further characterization of the RBPs and their regulatory mechanisms may provide  
469 critical insight into how *Bacteroides* coordinately control carbohydrate availability with  
470 cell surface properties. This could reveal key principles governing mechanisms in host  
471 dynamics.

472

473

474

## 475 **Materials and Methods**

### 476 **Bacterial culturing and genetic manipulation**

477 *B. thetaiotaomicron* VPI-5482 strains were grown anaerobically in a Coy  
478 Laboratory Products vinyl anaerobic chamber with an input gas of 20% CO<sub>2</sub>, 10% H<sub>2</sub>,  
479 70% N<sub>2</sub> balance. Routine culturing of *B. thetaiotaomicron* was done in Tryptone-Yeast-  
480 Extract-Glucose (TYG) (79) broth and on Difco Brain Heart Infusion (BHI) agar plates  
481 with 10% defibrinated Horse Blood (HB) (Quad Five) at 37°C. *Escherichia coli* strains  
482 were grown aerobically at 37°C on BHI-10%HB for conjugations and Luria Broth for all  
483 other applications. Minimal medium (22) was supplemented with B<sub>12</sub> [3.75nM final]  
484 (Sigma) and carbohydrates as needed at the following final w/v concentrations unless  
485 otherwise indicated: 4.0% stachyose (Sigma), 2.0% D-(+)-raffinose (Sigma), 0.5% D-  
486 (+)-melibiose (Sigma), 0.5% α-D-glucose (Sigma), 0.5% D-(+)-galactose (Sigma), 0.5%  
487 β-D-(-)-fructose (MP Biomedicals), and 0.5% sucrose (MP Biomedicals). When needed,  
488 antibiotics were added at the following final concentrations: 100 µg/ml ampicillin  
489 (Sigma), 200 µg/ml gentamicin (Goldbio), 25 µg/ml erythromycin (VWR), 200µg/ml 5'-  
490 fluoro-2'-deoxyuridine (VWR), 100ng/ml anhydrotetracycline (Sigma), 25 µg/ml  
491 kanamycin (Fisher). All strains, vectors, and primers are listed in Table S1. For all  
492 experiments, wild-type *B. thetaiotaomicron* is  $\Delta tdk$  (strain AA0014 in Table S1).

493 Markerless deletions were made in *B. thetaiotaomicron* using the  
494 pExchange\_ *bla\_tdk\_ermGb* (80) and the pLGB13\_ *bla\_ermG* (81) suicide vector-based  
495 allelic exchange methods. Upstream and downstream regions of the gene to be deleted  
496 were amplified using Kappa HiFi (Kappa Biosystems) and cloned into

497 pExchange\_ *bla\_tdk\_ermGb* using standard restriction digest and ligation methods and  
498 splicing by overlap exchange (SOE) (22). Alternatively, inserts were cloned into Q5  
499 (NEB) amplified pExchange\_ *bla\_tdk\_ermGb* using restriction digest and ligation of a  
500 gBlock insert (IDT). GibS flanks were Q5 amplified and ligated to restriction-digested  
501 pLGB13\_ *bla\_ermG*. Complete vectors were conjugated into *B. thetaiotaomicron* with *E.*  
502 *coli* S17  $\lambda$ -pir using established methods (22). Complementation pNBU2\_ *bla\_ermGb*  
503 vectors (5, 82) were cloned using standard restriction digest and ligation methods and  
504 conjugated into *B. thetaiotaomicron* as done with pExchange. pNBU2\_ *bla\_ermGb*  
505 vectors were PCR screened for insertion into a single attachment site as done  
506 previously (5). The pET-28a-*rbpB* protein expression vector was generated by inserting  
507 the *rbpB* (*BT1887*) ORF 5' to the thrombin cleavage site and 6xHis tag in the pET28a  
508 backbone. pET-28a-*rbpB* was cloned using Q5 PCR amplification and NEBuilder  
509 assembly (NEB) in *E. coli* XL10-Gold competent cells (Agilent) before being moved into  
510 *E. coli* BL21 (DE3) for protein expression.

## 511 **Computational identification of RNA regulators in human gut-associated** 512 **microbial genomes**

513 To identify genomes containing CsrA, ProQ, RRM-1, and Hfq in the human gut  
514 microbiome, we utilized a custom database of 313 human gut-associated microbial  
515 genomes containing a single representative genome for a species (22, 37). Candidate  
516 RNA regulator genes were identified using hmmer v3.3 (hmmer.org) with trusted cutoffs  
517 and the individual hidden Markov model from each protein queried: Hfq, PF17209.4;  
518 CsrA, PF02599.17; ProQ, PF04352.14; RRM-1, PF00076.23 (39). The resulting gene



519 list was then run against Pfam-A.hmm version 33.1 using hmmer to verify that the query  
520 PFAM was the top hit for the target domain using trusted cutoff values. ProQ  
521 PF04352.14 gene hits that also contained an N-terminal FinO\_N domain (PF12602.9)  
522 were removed from the final annotation list. RRM-1 PF00076.23 gene hit list was limited  
523 to less than 150 amino acids to remove a few genes containing transmembrane  
524 domains. The maximum likelihood phylogenetic tree in Fig. 1A was built using a  
525 multisequence alignment of 13 conserved core genes (AspS, Ffh, FusA, GltX, InfB,  
526 LeuS, RplB, RpsE, RpsH, RpsK, TopA, TufA, RpoB) identified and described previously  
527 (83). Briefly, protein sequences for each group of orthologs were individually aligned  
528 with MUSCLE (84), concatenated, and subjected to phylogenetic reconstruction with  
529 RAxML(85). The phylogeny was visualized using FigTree  
530 (<http://tree.bio.ed.ac.uk/software/figtree/>).

531

### 532 **RBP expression in publicly available RNA-seq datasets**

533 Publicly available RNA-seq datasets were downloaded from NCBI (see Table S2)  
534 for sample IDs. RNA-seq reads were quality filtered with Trimmomatic v0.36 (86). Read  
535 mapping and sample normalization was calculated with Rockhopper v2.03 (87, 88) and  
536 normalized expression values were graphed using JMP v15 (89).

### 537 **RbpB EMSAs and motif identification**

538 **Purification of RbpB.** *E. coli* BL21 (DE3) cells with the pET-*rbpB* vector were  
539 grown to late exponential phase (0.6-0.8 OD<sub>600</sub> as measured on an Ultraspec 2100 Pro,  
540 Amersham) and protein expression induced with 1 mM final IPTG (Goldbio) for 4 hr at

541 37 °C. Cells were harvested by centrifugation and pellets resuspended in 30 ml of  
542 extraction buffer (1X PBS, 0.5M NaCl, pH 7.2) before being lysed in a French press.  
543 Supernatant was collected after centrifugation at 16,000 × g for 10 min at 4°C. The  
544 supernatant was then fractionated using a HiTrap Ni<sup>2+</sup> column (GE Healthcare)  
545 following the manufacturer's instructions. Fractions containing RbpB were dialyzed  
546 overnight in TGED buffer (10 mM Tris-HCl pH 8, 5% glycerol, 0.1mM EDTA, and DTT  
547 0.015 mg/mL) and loaded onto a HiTrap-Q column (GE Healthcare). The column was  
548 washed with TGED buffer, and protein was eluted with a linear gradient of NaCl (0.1 M  
549 to 1 M) in TGED buffer. The fractions containing the protein were pooled, dialyzed, and  
550 concentrated using Centricon 10 concentrators (Millipore-Sigma), mixed with an equal  
551 volume of 100% glycerol and stored at -20°C.

552 **Radiolabeled pentaprobe synthesis.** Twelve pentaprobases containing all the  
553 possible 5-nt combinations were prepared based on a published protocol with some  
554 modifications (52). All oligonucleotides used in pentaprobe synthesis are listed in Table  
555 S1. Single-stranded oligonucleotides for PP1-PP6 were Q5 PCR amplified with a 5' T7  
556 promoter for either the Watson strand or the Crick strand, generating twelve dsDNA  
557 templates with a single T7 site, two each for PP1-PP6. The Watson strand of PP1  
558 dsDNA is identical to the coding strand of the PP1 pentaprobe, and the Crick strand is  
559 identical to the coding strand of the PP7 pentaprobe. These dsDNA fragments were  
560 then used to produce twelve different ssRNA pentaprobases by *in vitro* transcription from  
561 the T7 promoter with a MEGAscript T7 kit (Ambion). Transcribed RNA fragments were  
562 5' end-labeled with ATP [ $\gamma$ <sup>32</sup>P] (PerkinElmer) using the KinaseMax kit (Ambion) following  
563 the manufacturer's protocol.

564           **Electrophoretic mobility shift assay and motif prediction.** RNA-protein gel  
565 electrophoretic mobility shift assays were performed using 0.01 pmol of <sup>32</sup>P-labeled  
566 pentaprobe RNA and the indicated amounts of RbpB in binding buffer (10mM Tris-HCl  
567 pH 8.0, 0.5 mM DTT, 0.5 mM MgCl<sub>2</sub>, 10mM KCl, 5mM Na<sub>2</sub>HPO<sub>4</sub>–NaH<sub>2</sub>PO<sub>4</sub> pH 8.0). The  
568 mixture was incubated at 37 °C for 30 minutes, and non-denaturing loading buffer (50%  
569 glycerol and 0.1% bromophenol blue) was added. The samples were resolved on a  
570 4.6% native polyacrylamide gel for 1.5 hours at 10 mA. The fraction of RbpB bound was  
571 determined using a Fluorescent Image Analyzer FLA-3000 (FUJIFILM) to quantify the  
572 band intensities. *K<sub>D</sub>* values were calculated using Sigmaplot software based on a  
573 published method (90). The MEME program (55) was used to predict conserved motifs  
574 for the positive pentaprobe sequences with the following parameters: maximum number  
575 of motifs, 10; minimum motif width, 4; and maximum motif width, 8. *K<sub>D</sub>* was calculated  
576 for RbpB binding to PP3 and motif 1 using three technical replicates as done previously  
577 (56).

#### 578 **RNA sequencing sample prep and processing**

579           For rich media RNA-seq, strains were cultured in 5 ml of TYG in biological  
580 triplicate to stationary phase overnight. Each culture was then sub-cultured 1:100 into  
581 two 5 ml TYG cultures. One tube was cultured to mid-log (0.35-0.6 OD<sub>600</sub>) and the  
582 second tube was cultured to early stationary phase (1.2-1.4 OD<sub>600</sub>) as measured in a  
583 Thermo Spectronic 200 (Thermo Fisher Scientific brand, referred to as ThermoSpec  
584 below). Then 500 µl of cells were then spun down at 7,500 x g for 3 min at room  
585 temperature, supernatant removed, and pellets re-suspended in 600 µl of TriReagent

586 (Sigma). RNA was then isolated from the re-suspensions using the Zymo Direct-Zol  
587 RNA Mini-Prep kit (Zymo) which includes on-column DNaseI treatment. RNA quality  
588 was evaluated using a Qubit 2.0 fluorometer (Invitrogen) and Agilent 2100 Bioanalyzer  
589 (UIUC Biotechnology Center). Total RNA was then submitted to the W. M. Keck Center  
590 for Comparative and Functional Genomics at UIUC for rRNA depletion, library  
591 construction, and sequencing. Briefly, ribosomal RNAs were removed from total RNA  
592 with an Illumina Ribo-Zero rRNA Removal Kit for Bacteria. RNA-seq libraries were  
593 produced with a ScriptSeq v2 kit (Illumina) and cleaned with AMPure beads (Beckman  
594 Coulter) to remove any fragments <80 nt. Libraries were sequenced on an Illumina  
595 HiSeq2500 using HiSeq SBS sequencing kit v4 to give 160 nt single-end reads. Results  
596 were de-multiplexed with bcl2fastq v2.17.1.14 (Illumina). Reads were quality filtered and  
597 trimmed using Bioconductor package ShortRead (91) to first remove reads with >1 N or  
598 if  $\geq 75\%$  of a read is a single nucleotide and then the first 2 nucleotides were removed  
599 from each sequence read. Sequencing adapters were removed with fastx\_clipper  
600 ([http://hannonlab.cshl.edu/fastx\\_toolkit/index.html](http://hannonlab.cshl.edu/fastx_toolkit/index.html)). Residual rRNAs were removed  
601 using bowtie2 (92, 93) and final reads mapped to the genome and analyzed using  
602 Rockhopper v2.03. All raw Rockhopper calculated expression values were increased by  
603 1 and fold changes (FC) calculated as  $\log_2(\text{mutant expression value} + 1/\text{wild-type}$   
604  $\text{expression value} + 1)$ . RNA-seq processing statistics are summarized in Dataset S2C.

605 For RNA-seq of cultures grown in minimal media, a single colony/strain was  
606 smeared onto half a 100 mm BHI-10%HB agar plate with a cotton swab and cultured for  
607 24 hours. Lawns were then re-suspended in 5 ml of minimal medium + glucose (MMG)  
608 and spun down at 4000g x 5 min. Cell pellets were washed three times with 1 ml of

609 MMG and then diluted to 0.07 OD<sub>630</sub> in 200 µl of MMG, as measured on a Biotek  
610 Synergy HT plate reader (referred to as Biotek below). Cells were then diluted 1:1000 in  
611 25 ml of MMG and cultured overnight to 0.35-0.50 OD<sub>600</sub> (ThermoSpec). Cells were  
612 then spun down and re-suspended in 1 ml of minimal medium without a carbon source  
613 per every 5 ml of culture. For each biological replicate, these suspensions were then  
614 diluted to 0.1 OD<sub>600</sub> (ThermoSpec) in 5 ml of MMG, minimal medium + melibiose  
615 (MMM), or minimal medium + 0.25% w/v glucose + 0.25% w/v galactose (MMGG).  
616 Cultures were then grown to 0.45-0.65 OD<sub>600</sub> (ThermoSpec), and then stabilized in  
617 Qiagen RNA protect. Briefly, 4 ml of culture was combined with 8 ml of RNA protect,  
618 vortexed, and then incubated at room temperature for 5 min. Suspensions were then  
619 spun at 4,000 x g for 10 minutes at 4°C. Supernatants were decanted and pellets stored  
620 at -80 °C. Cell pellets were thawed, and RNA prepped using a Qiagen RNeasy Mini Kit.  
621 RNA was sequenced and analyzed as done above with the RNA-seq for cells grown in  
622 TYG, with the exception that libraries were sequenced on an Illumina HiSeq4000 to  
623 produce 150 nt single-end reads.

#### 624 **RNA-seq protein functional and pathway analyses**

625 RNA-seq data from each mutant strain (*ΔrbpA*, *ΔrbpB*, *ΔrbpAΔrbpB*) was  
626 compared to wild-type in rich medium at mid-log and stationary phase, yielding six  
627 comparisons. All genes with a log<sub>2</sub>FC ≥ +1 or ≤ -1 with a q-value <0.06 were assigned  
628 to functional groups using the following framework. GSEA was used on each of the six  
629 differentially expressed gene sets individually to identify enriched functional groups. *B.*  
630 *thetaiotaomicron*-specific functional gene sets used included: KEGG pathways, CPS  
631 loci, PULs, and corrinoid transport (22). GSEA identified enriched gene sets

632 corresponding to PULs, CPS loci, TCA cycle (KEGG pathway bth00020), corrinoid  
633 transport, and microbial metabolism in diverse environments (bth01120). Since these  
634 were identified as enriched categories, if one of the significantly differentially regulated  
635 genes in Dataset S2A was part of one of these gene sets, it was assigned that as a  
636 category identifier with the exception of “microbial metabolism in diverse environments.”  
637 GSEA-identified enriched genes in this KEGG category were further split into sub-  
638 categories including TCA cycle and glyoxylate and dicarboxylate metabolism  
639 (bth00630). If genes were associated with both TCA cycle and glyoxylate and  
640 dicarboxylate metabolism, they were assigned TCA cycle since this category was  
641 identified as enriched by GSEA directly, but glyoxylate and dicarboxylate metabolism  
642 was not. Since corrinoid transport was enriched in our differentially expressed genes,  
643 any gene associated with B<sub>12</sub> metabolism that was in our differentially regulated genes  
644 was assigned a “B-vitamin metabolism” category. Remaining gene functions were  
645 assigned using gene ontology (GO) from QuickGO. Briefly, gene names were used to  
646 extract UniprotKB identifiers that were then used to pull GO biological process  
647 annotations from QuickGO when available. Only the first reported GO assignment was  
648 used for each gene. GO terms were further grouped into custom functional categories to  
649 make a more tractably sized list of functional categories for visualization. Genes without  
650 any of the above functional assignments were labeled as either “hypothetical protein” if  
651 they were annotated as such or “miscellaneous” if the gene had a putative functional  
652 annotation that was not captured by the other functional categories. All resulting  
653 functional groups are listed in Dataset S2A.

654 **Biolog carbon utilization assays**

655           Biolog carbon utilization assays were conducted according to manufacturer  
656 recommendations as follows. Biolog carbon source PM1 and PM2A MicroPlates were  
657 brought to room temperature to avoid condensation prior to opening the seals. Plates  
658 were then cycled into the anaerobic chamber and maintained in an anaerobic desiccant  
659 box for 24 hours. Single colonies of each strain were swabbed onto BHI-10% horse  
660 blood plates and cultured overnight to produce a lawn of cells. Cells were aerobically  
661 suspended into 5 ml of reduced minimal medium without a carbon source to 40%  
662 turbidity (OD<sub>590</sub>, ThermoSpec) using a cotton swab. Suspensions were cycled into the  
663 chamber and 1.5 ml combined with 22 ml of anoxic, reduced minimal medium without a  
664 carbon source. Each carbon source plate was then inoculated with 100 µl of diluted  
665 cells and statically incubated for 30 minutes at room temperature to facilitate compound  
666 dissolution before measuring time point zero. Plates were statically incubated at 37 °C  
667 with manual OD<sub>630</sub> readings taken every hour in the plate reader for the first 11 hours of  
668 growth. Plates were then left in the chamber overnight and optical density readings  
669 were resumed after 24 hours of growth. Time points were then taken every 3 hours to a  
670 final time point of 36 hours of growth. Linear regression and prediction curves were  
671 calculated using Prism. Negative control wells and Xylitol (PM2A) were removed from  
672 linear regression calculations. Xylitol was removed due to an unknown occlusion  
673 (potentially condensation or precipitation) causing transiently high OD<sub>630</sub> readings. In  
674 the absence of these transient values, *B. thetaiotaomicron* could not grow on Xylitol as  
675 a sole carbon source in these experiments.

#### 676 **Minimal media growth assays**

677 Strains were cultured from a colony in 5 ml of TYG for 24 hours and then sub-  
678 cultured 1:1000 into 5 ml of MMG for 24 hours. 1 ml of stationary phase MMG cultures  
679 were spun down 4000 g x 10 min at room temperature. Supernatants were removed  
680 and pellets resuspended in 1 ml of minimal medium without a carbon source. 2 µl of  
681 cells were then sub-cultured into 198 µl of minimal media containing carbon sources to  
682 appropriate final concentrations in flat bottom, 96 well Corning Costar tissue culture-  
683 treated plates (Sigma). Plates were sealed with a Breathe-Easy gas permeable  
684 membrane (Sigma) and statically cultured in the Biotek plate reader for 48 hours with  
685 optical density recorded every 30 minutes.

#### 686 **qRT-PCR of *rbpB* and *BT1871***

687 Strains were cultured in MMG to stationary phase overnight, sub-cultured 1:100  
688 into 5 ml of MMG, and then cultured to mid-log (0.38-0.52 OD<sub>600</sub>, ThermoSpec). All  
689 cultures for strains containing pNBU2\_ *ermGb* vectors contained erythromycin. Four ml  
690 of cells were pelleted at 4,000 g x 10 min, supernatant decanted, and then RNA isolated  
691 with a Qiagen RNeasy mini kit. Residual DNA was degraded on-column using Qiagen  
692 RNase-Free DNase Set and the RNA cleaned with a Qiagen RNeasy Mini kit. First-  
693 strand cDNA synthesis was done with a SuperScript II RT kit (Invitrogen) and random  
694 hexamers (Invitrogen). Post reverse transcription, the SuperScript reaction was  
695 incubated with 27 µl of 1N NaOH at 65 °C for 30 min, neutralized with 27 µl of 1N HCl,  
696 and cleaned up with a Qiagen MinElute PCR purification kit. cDNA was diluted and  
697 *rbpB*, *BT1871*, and 16s rRNA copies amplified using 2x QX200 ddPCR EvaGreen  
698 Supermix (Biorad) and quantified using the QX200 Droplet Digital PCR system (Biorad)



699 according to manufacturer instructions. All ddPCR consumables were supplied by  
700 Biorad and Rainin (pipette tips only). Relative ratios were calculated by dividing the  
701 *rbpB* or *BT1871* counts by the 16s rRNA counts.

## 702 **Determination of operon structure of *rbpB* in *B. thetaiotaomicron***

703 Strains were cultured in MMG to stationary phase overnight and then sub-  
704 cultured 1:1,000 into 4 ml of MMM and 1:10,000 into 4 ml MMG. MMG and MMM  
705 cultures were grown to mid-log (OD<sub>630</sub> 0.25-0.35, Biotek), pelleted at 4,000g x 10 min at  
706 4°C, and supernatant removed. RNA and cDNA were prepped as done for qPCR with  
707 the exception that residual DNA was degraded on beads using an Ambion nuclease-  
708 free DNase kit. Overlap end-point PCR was done with KAPA HiFi (KAPA Biosystems).  
709 gDNA was prepped using a Qiagen DNeasy Blood and tissue kit.

## 710 **Data Availability**

711 All RNA-seq datasets corresponding to the samples listed in Dataset S2C are  
712 publicly available on NCBI under BioProject accession number PRJNA723047.

713

714 **Acknowledgements**

715 We thank Alvaro Hernandez, Chris Wright, and staff of the Roy J. Carver  
716 Biotechnology Center for assistance with RNA-seq. We also thank Danielle Campbell  
717 for guidance on comparative genomics and Auroi Gupta and Saika Hossain for  
718 assistance with EMSAs. We are grateful to Sandy Pernitzch (Scigraphix) for assistance  
719 with model graphics. This work was funded by UIUC and the UIUC Department of  
720 Microbiology, a Roy J. Carver Charitable Trust award (15-4501) to P.H.D. and initial  
721 complement funding to P.H.D. from UCR. A.N.D.A. was funded by an Alice Helm  
722 Graduate Research Excellence Fellowship and the UIUC Department of Microbiology.

723 A.N.D.A, M.S.A, Z.A.C., P.H.D, and C.K.V. designed research and analyzed  
724 data. A.N.D.A., M.S.A., Z.A.C., X.M., and P.H.D. performed research. A.N.D.A., M.S.A.,  
725 P.H.D., and C.K.V. wrote the paper.

726

727

728 **References**

729

- 730 1. Muegge BD, Kuczynski J, Knights D, Clemente JC, González A, Fontana L,  
731 Henrissat B, Knight R, Gordon JI. 2011. Diet drives convergence in gut microbiome  
732 functions across mammalian phylogeny and within humans. *Science* 332:970–974.
- 733 2. Carmody RN, Gerber GK, Luevano JM, Gatti DM, Somes L, Svenson KL, Turnbaugh  
734 PJ. 2015. Diet dominates host genotype in shaping the murine gut microbiota. *Cell Host*  
735 *Microbe* 17:72–84.
- 736 3. Wu GD, Chen J, Hoffmann C, Bittinger K, Chen YY, Keilbaugh SA, Bewtra M,  
737 Knights D, Walters WA, Knight R, Sinha R, Gilroy E, Gupta K, Baldassano R, Nessel L,  
738 Li H, Bushman FD, Lewis JD. 2011. Linking long-term dietary patterns with gut microbial  
739 enterotypes. *Science* 334:105–108.
- 740 4. Kaoutari AE, Armougom F, Gordon JI, Raoult D, Henrissat B. 2013. The abundance  
741 and variety of carbohydrate-active enzymes in the human gut microbiota. *Nat Rev*  
742 *Microbiol* 11:497–504.
- 743 5. Martens EC, Chiang HC, Gordon JI. 2008. Mucosal glycan foraging enhances fitness  
744 and transmission of a saccharolytic human gut bacterial symbiont. *Cell Host Microbe*  
745 4:447–457.

- 746 6. Rogers TE, Pudlo NA, Koropatkin NM, Bell JSK, Balasch MM, Jasker K, Martens EC.  
747 2013. Dynamic responses of *Bacteroides thetaiotaomicron* during growth on glycan  
748 mixtures. *Mol Microbiol* 88:876–890.
- 749 7. Terrapon N, Lombard V, Drula É, Lapébie P, Al-Masaudi S, Gilbert HJ, Henrissat B.  
750 2017. PULDB: the expanded database of Polysaccharide Utilization Loci. *Nucleic Acids*  
751 *Res* 46:D677–D683.
- 752 8. Pereira GV, Abdel-Hamid AM, Dutta S, D’Alessandro-Gabazza CN, Wefers D, Farris  
753 JA, Bajaj S, Wawrzak Z, Atomi H, Mackie RI, Gabazza EC, Shukla D, Koropatkin NM,  
754 Cann I. 2021. Degradation of complex arabinoxylans by human colonic Bacteroidetes.  
755 *Nat Commun* 12:459.
- 756 9. Martens EC, Lowe EC, Chiang H, Pudlo NA, Wu M, McNulty NP, Abbott DW,  
757 Henrissat B, Gilbert HJ, Bolam DN, Gordon JI. 2011. Recognition and degradation of  
758 plant cell wall polysaccharides by two human gut symbionts. *PLoS Biol* 9:e1001221.
- 759 10. Xu J, Bjursell MK, Himrod J, Deng S, Carmichael LK, Chiang HC, Hooper LV,  
760 Gordon JI. 2003. A genomic view of the human-*Bacteroides thetaiotaomicron*  
761 symbiosis. *Science* 299:2074–2076.
- 762 11. Xu J, Chiang HC, Bjursell MK, Gordon JI. 2004. Message from a human gut  
763 symbiont: sensitivity is a prerequisite for sharing. *Trends Microbiol* 12:21–28.

764 12. Cho KH, Cho D, Wang GR, Salyers AA. 2001. New regulatory gene that contributes  
765 to control of *Bacteroides thetaiotaomicron* starch utilization genes. J Bacteriol  
766 183:7198–7205.

767 13. Schwalm ND, Townsend GE, Groisman EA. 2016. Multiple signals govern utilization  
768 of a polysaccharide in the gut bacterium *Bacteroides thetaiotaomicron*. mBio 7:e01342-  
769 16.

770 14. Chang C, Tesar C, Li X, Kim Y, Rodionov DA, Joachimiak A. 2015. A novel  
771 transcriptional regulator of L-arabinose utilization in human gut bacteria. Nucleic Acids  
772 Res 43:10546–10559.

773 15. Ravcheev DA, Godzik A, Osterman AL, Rodionov DA. 2013. Polysaccharides  
774 utilization in human gut bacterium *Bacteroides thetaiotaomicron*: comparative genomics  
775 reconstruction of metabolic and regulatory networks. BMC Genomics 14:873.

776 16. Sonnenburg ED, Zheng H, Joglekar P, Higginbottom SK, Firbank SJ, Bolam DN,  
777 Sonnenburg JL. 2010. Specificity of polysaccharide use in intestinal *Bacteroides*  
778 species determines diet-induced microbiota alterations. Cell 141:1241–1252.

779 17. Martens EC, Roth R, Heuser JE, Gordon JI. 2009. Coordinate regulation of glycan  
780 degradation and polysaccharide capsule biosynthesis by a prominent human gut  
781 symbiont. J Biol Chem 284:18445–18457.

- 782 18. Pudlo NA, Urs K, Kumar SS, German JB, Mills DA, Martens EC. 2015. Symbiotic  
783 human gut bacteria with variable metabolic priorities for host mucosal glycans. *mBio*  
784 6:e01282-15.
- 785 19. Cao Y, Förstner KU, Vogel J, Smith CJ. 2016. *cis*-encoded small RNAs, a  
786 conserved mechanism for repression of polysaccharide utilization in *Bacteroides*. *J*  
787 *Bacteriol* 198:2410–2418.
- 788 20. Townsend GE, Han W, Schwalm ND, Hong X, Bencivenga-Barry NA, Goodman AL,  
789 Groisman EA. 2020. A master regulator of *Bacteroides thetaiotaomicron* gut  
790 colonization controls carbohydrate utilization and an alternative protein synthesis factor.  
791 *mBio* 11:03221–19.
- 792 21. Ryan D, Jenniches L, Reichardt S, Barquist L, Westermann AJ. 2020. A high-  
793 resolution transcriptome map identifies small RNA regulation of metabolism in the gut  
794 microbe *Bacteroides thetaiotaomicron*. *Nat Commun* 11:3557.
- 795 22. Degnan PH, Barry NA, Mok KC, Taga ME, Goodman AL. 2014. Human gut  
796 microbes use multiple transporters to distinguish vitamin B<sub>12</sub> analogs and compete in  
797 the gut. *Cell Host Microbe* 15:47–57.
- 798 23. Costliow ZA, Degnan PH. 2017. Thiamine acquisition strategies impact metabolism  
799 and competition in the gut microbe *Bacteroides thetaiotaomicron*. *mSystems* 2:e00116-  
800 17.

- 801 24. Costliow ZA, Degnan PH, Vanderpool CK. 2019. Thiamine pyrophosphate  
802 riboswitches in *Bacteroides* species regulate transcription or translation of thiamine  
803 transport and biosynthesis genes. bioRxiv 867226.
- 804 25. Papenfort K, Vogel J. 2014. Small RNA functions in carbon metabolism and  
805 virulence of enteric pathogens. Front Cell Infect Microbiol 4:1–12.
- 806 26. Smirnov A, Schneider C, Hör J, Vogel J. 2017. Discovery of new RNA classes and  
807 global RNA-binding proteins. Curr Opin Microbiol 39:1–9.
- 808 27. Hör J, Gorski SA, Vogel J. 2018. Bacterial RNA biology on a genome scale. Mol Cell  
809 70:785–799.
- 810 28. Vogel J, Luisi BF. 2011. Hfq and its constellation of RNA. Nat Rev Microbiol 9:578–  
811 589.
- 812 29. Santiago-Frangos A, Woodson SA. 2018. Hfq chaperone brings speed dating to  
813 bacterial sRNA. Wiley Interdiscip Rev RNA 9:e1475.
- 814 30. Iosub IA, Nues RW van, McKellar SW, Nieken KJ, Marchioretto M, Sy B, Tree JJ,  
815 Viero G, Granneman S. 2020. Hfq CLASH uncovers sRNA-target interaction networks  
816 linked to nutrient availability adaptation. eLife 9:e54655.
- 817 31. Melamed S, Peer A, Faigenbaum-Romm R, Gatt YE, Reiss N, Bar A, Altuvia Y,  
818 Argaman L, Margalit H. 2016. Global mapping of small RNA-target interactions in  
819 bacteria. Molecular Cell 63:884–897.

- 820 32. Chao Y, Vogel J. 2010. The role of Hfq in bacterial pathogens. *Curr Opin Microbiol*  
821 13:24–33.
- 822 33. Richards GR, Vanderpool CK. 2011. Molecular call and response: the physiology of  
823 bacterial small RNAs. *Biochim Biophys Acta* 1809:525–531.
- 824 34. Bobrovskyy M, Vanderpool CK. 2014. The small RNA SgrS: roles in metabolism and  
825 pathogenesis of enteric bacteria. *Front Cell Infect Microbiol* 4:1–8.
- 826 35. Waters JL, Salyers AA. 2012. The small RNA RteR inhibits transfer of the  
827 *Bacteroides conjugative* transposon CTnDOT. *J Bacteriol* 194:5228–5236.
- 828 36. Townsend GE, Han W, Schwalm ND, Raghavan V, Barry NA, Goodman AL,  
829 Groisman EA. 2019. Dietary sugar silences a colonization factor in a mammalian gut  
830 symbiont. *Proc Natl Acad Sci U S A* 116:233–238.
- 831 37. Methé BA, Nelson KE, Pop M, Creasy HH, Giglio MG, Huttenhower C, Gevers D,  
832 Petrosino JF, Abubucker S, Badger JH, Chinwalla AT, Earl AM, FitzGerald MG, Fulton  
833 RS, Hallsworth-Pepin K, Lobos EA, Madupu R, Magrini V, Martin JC, Mitreva M, Muzny  
834 DM, Sodergren EJ, Versalovic J, Wollam AM, Worley KC, Wortman JR, Young SK,  
835 Zeng Q, Aagaard KM, Abolude OO, Allen-Vercoe E, Alm EJ, Alvarado L, Andersen GL,  
836 Anderson S, Appelbaum E, Arachchi HM, Armitage G, Arze CA, Ayvaz T, Baker CC,  
837 Begg L, Belachew T, Bhonagiri V, Bihan M, Blaser MJ, Bloom T, Bonazzi VR, Brooks P,  
838 Buck GA, Buhay CJ, Busam DA, Campbell JL, Canon SR, Cantarel BL, Chain PS,  
839 Chen I-MA, Chen L, Chhibba S, Chu K, Ciulla DM, Clemente JC, Clifton SW, Conlan S,  
840 Crabtree J, Cutting MA, Davidovics NJ, Davis CC, DeSantis TZ, Deal C, Delehaunty



841 KD, Dewhirst FE, Deych E, Ding Y, Dooling DJ, Dugan SP, Dunne WM, Durkin AS,  
842 Edgar RC, Erlich RL, Farmer CN, Farrell RM, Faust K, Feldgarden M, Felix VM, Fisher  
843 S, Fodor AA, Forney L, Foster L, Francesco VD, Friedman J, Friedrich DC, Fronick CC,  
844 Fulton LL, Gao H, Garcia N, Giannoukos G, Giblin C, Giovanni MY, Goldberg JM, Goll  
845 J, Gonzalez A, Griggs A, Gujja S, Haas BJ, Hamilton HA, Harris EL, Hepburn TA,  
846 Herter B, Hoffmann DE, Holder ME, Howarth C, Huang KH, Huse SM, Izard J, Jansson  
847 JK, Jiang H, Jordan C, Joshi V, Katancik JA, Keitel WA, Kelley ST, Kells C, Kinder-  
848 Haake S, King NB, Knight R, Knights D, Kong HH, Koren O, Koren S, Kota KC, Kovar  
849 CL, Kyrpides NC, Rosa PSL, Lee SL, Lemon KP, Lennon N, Lewis CM, Lewis L, Ley  
850 RE, Li K, Liolios K, Liu B, Liu Y, Lo C-C, Lozupone CA, Lunsford RD, Madden T,  
851 Mahurkar AA, Mannon PJ, Mardis ER, Markowitz VM, Mavrommatis K, McCorrison JM,  
852 McDonald D, McEwen J, McGuire AL, McInnes P, Mehta T, Mihindukulasuriya KA,  
853 Miller JR, Minx PJ, Newsham I, Nusbaum C, O’Laughlin M, Orvis J, Pagani I,  
854 Palaniappan K, Patel SM, Pearson M, Peterson J, Podar M, Pohl C, Pollard KS, Priest  
855 ME, Proctor LM, Qin X, Raes J, Ravel J, Reid JG, Rho M, Rhodes R, Riehle KP, Rivera  
856 MC, Rodriguez-Mueller B, Rogers Y-H, Ross MC, Russ C, Sanka RK, Sankar P,  
857 Sathirapongsasuti JF, Schloss JA, Schloss PD, Schmidt TM, Scholz M, Schriml L,  
858 Schubert AM, Segata N, Segre JA, Shannon WD, Sharp RR, Sharpton TJ, Shenoy N,  
859 Sheth NU, Simone GA, Singh I, Smillie CS, Sobel JD, Sommer DD, Spicer P, Sutton  
860 GG, Sykes SM, Tabbaa DG, Thiagarajan M, Tomlinson CM, Torralba M, Treangen TJ,  
861 Truty RM, Vishnivetskaya TA, Walker J, Wang L, Wang Z, Ward DV, Warren W,  
862 Watson MA, Wellington C, Wetterstrand KA, White JR, Wilczek-Boney K, Wu YQ, Wylie  
863 KM, Wylie T, Yandava C, Ye L, Ye Y, Yooseph S, Youmans BP, Zhang L, Zhou Y, Zhu

- 864 Y, Zoloth L, Zucker JD, Birren BW, Gibbs RA, Highlander SK, Weinstock GM, Wilson  
865 RK, White O. 2012. A framework for human microbiome research. *Nature* 486:215–221.
- 866 38. Maris C, Dominguez C, Allain FHT. 2005. The RNA recognition motif, a plastic RNA-  
867 binding platform to regulate post-transcriptional gene expression. *FEBS J* 272:2118–  
868 2131.
- 869 39. El-Gebali S, Mistry J, Bateman A, Eddy SR, Luciani A, Potter SC, Qureshi M,  
870 Richardson LJ, Salazar GA, Smart A, Sonnhammer ELL, Hirsh L, Paladin L, Piovesan  
871 D, Tosatto SCE, Finn RD. 2019. The Pfam protein families database in 2019. *Nucleic  
872 Acids Res* 47:D427–D432.
- 873 40. Herren CD, Rocha ER, Smith CJ. 2003. Genetic analysis of an important oxidative  
874 stress locus in the anaerobe *Bacteroides fragilis*. *Gene* 316:167–175.
- 875 41. Voss JE, Luisi BF, Hardwick SW. 2014. Molecular recognition of RhIB and RNase D  
876 in the *Caulobacter crescentus* RNA degradosome. *Nucleic Acids Res* 42:13294–13305.
- 877 42. Al-Husini N, Tomares DT, Bitar O, Childers WS, Schrader JM. 2018.  $\alpha$ -  
878 Proteobacterial RNA degradosomes assemble liquid-liquid phase-separated RNP  
879 bodies. *Mol Cell* 71:1027–1039.
- 880 43. Santiago-Frangos A, Kavita K, Schu DJ, Gottesman S, Woodson SA. 2016. C-  
881 terminal domain of the RNA chaperone Hfq drives sRNA competition and release of  
882 target RNA. *Proc Natl Acad Sci U S A* 113:E6089–E6096.

- 883 44. Večerek B, Rajkowitsch L, Sonnleitner E, Schroeder R, Bläsi U. 2007. The C-  
884 terminal domain of *Escherichia coli* Hfq is required for regulation. *Nucleic Acids Res*  
885 36:133–143.
- 886 45. Santiago-Frangos A, Jeliazkov JR, Gray JJ, Woodson SA. 2017. Acidic C-terminal  
887 domains autoregulate the RNA chaperone Hfq. *eLife* 6:e27049.
- 888 46. Sobrero P, Valverde C. 2012. The bacterial protein Hfq: much more than a mere  
889 RNA-binding factor. *Crit Rev Microbiol* 38:276–299.
- 890 47. Desai MS, Seekatz AM, Koropatkin NM, Kamada N, Hickey CA, Wolter M, Pudlo  
891 NA, Kitamoto S, Terrapon N, Muller A, Young VB, Henrissat B, Wilmes P, Stappenbeck  
892 TS, Núñez G, Martens EC. 2016. A dietary fiber-deprived gut microbiota degrades the  
893 colonic mucus barrier and enhances pathogen susceptibility. *Cell* 167:1339–1353.
- 894 48. Wu M, McNulty NP, Rodionov DA, Khoroshkin MS, Griffin NW, Cheng J, Latreille P,  
895 Kerstetter RA, Terrapon N, Henrissat B, Osterman AL, Gordon JI. 2015. Genetic  
896 determinants of *in vivo* fitness and diet responsiveness in multiple human gut  
897 *Bacteroides*. *Science* 350:aac5992.
- 898 49. Huang Y, Sheth RU, Kaufman A, Wang HH. 2019. Scalable and cost-effective  
899 ribonuclease-based rRNA depletion for transcriptomics. *Nucleic Acids Res* 48:e20.
- 900 50. Despres J, Forano E, Lepercq P, Comtet-Marre S, Jubelin G, Chambon C, Yeoman  
901 CJ, Miller MEB, Fields CJ, Martens E, Terrapon N, Henrissat B, White BA, Mosoni P.  
902 2016. Xylan degradation by the human gut *Bacteroides xylanisolvens* XB1AT involves

- 903 two distinct gene clusters that are linked at the transcriptional level. *BMC Genomics*  
904 17:1–14.
- 905 51. Schofield WB, Zimmermann-Kogadeeva M, Zimmermann M, Barry NA, Goodman  
906 AL. 2018. The stringent response determines the ability of a commensal bacterium to  
907 survive starvation and to persist in the gut. *Cell Host Microbe* 24:120–132.
- 908 52. Bendak K, Loughlin FE, Cheung V, O’Connell MR, Crossley M, Mackay JP. 2012. A  
909 rapid method for assessing the RNA-binding potential of a protein. *Nucleic Acids Res*  
910 40:e105.
- 911 53. Teplova M, Farazi TA, Tuschl T, Patel DJ. 2016. Structural basis underlying CAC  
912 RNA recognition by the RRM domain of dimeric RNA-binding protein RBPMS. *Q Rev*  
913 *Biophys* 49:e1.
- 914 54. Afroz T, Cienikova Z, Cléry A, Allain FHT. 2015. One, two, three, four! How multiple  
915 RRMs read the genome sequence. *Methods Enzymol* 558:235–278.
- 916 55. Bailey TL, Boden M, Buske FA, Frith M, Grant CE, Clementi L, Ren J, Li WW, Noble  
917 WS. 2009. MEME Suite: tools for motif discovery and searching. *Nucleic Acids Res*  
918 37:W202–W208.
- 919 56. Azam MS, Vanderpool CK. 2017. Translational regulation by bacterial small RNAs  
920 via an unusual Hfq-dependent mechanism. *Nucleic Acids Res* 46:2585–2599.

- 921 57. Stein EM, Kwiatkowska J, Basczok MM, Gravel CM, Berry KE, Olejniczak M. 2020.  
922 Determinants of RNA recognition by the FinO domain of the *Escherichia coli* ProQ  
923 protein. *Nucleic Acids Res* 48:7502–7519.
- 924 58. Nithin C, Mukherjee S, Bahadur RP. 2019. A structure-based model for the  
925 prediction of protein-RNA binding affinity. *RNA* 25:1628–1645.
- 926 59. Subramanian A, Tamayo P, Mootha VK, Mukherjee S, Ebert BL, Gillete MA,  
927 Paulovich A, Pomeroy SL, Golub TR, Lander ES, Mesirov JP. 2005. Gene set  
928 enrichment analysis: a knowledge-based approach for interpreting genome-wide  
929 expression profiles *102*:15545–15550.
- 930 60. Krinos CM, Coyne MJ, Weinacht KG, Tzianabos AO, Kasper DL, Comstock LE.  
931 2001. Extensive surface diversity of a commensal microorganism by multiple DNA  
932 inversions. *Nature* 414:555–558.
- 933 61. Gloster TM, Turkenburg JP, Potts JR, Henrissat B, Davies GJ. 2008. Divergence of  
934 catalytic mechanism within a glycosidase family provides insight into evolution of  
935 carbohydrate metabolism by human gut flora. *Chem Biol* 15:1058–1067.
- 936 62. Liu H, Shiver AL, Price MN, Carlson HK, Trotter VV, Chen Y, Escalante V, Ray J,  
937 Hern KE, Petzold CJ, Turnbaugh PJ, Huang KC, Arkin AP, Deutschbauer AM. 2021.  
938 Functional genetics of human gut commensal *Bacteroides thetaiotaomicron* reveals  
939 metabolic requirements for growth across environments. *Cell Rep* 34:108789.

- 940 63. Faith JJ, McNulty NP, Rey FE, Gordon JI. 2011. Predicting a human gut  
941 microbiota's response to diet in gnotobiotic mice. *Science* 333:101–104.
- 942 64. Sonnenburg JL, Xu J, Leip DD, Chen CH, Westover BP, Weatherford J, Buhler JD,  
943 Gordon JI. 2005. Glycan foraging *in vivo* by an intestine-adapted bacterial symbiont.  
944 *Science* 307:1955–1959.
- 945 65. Turnbaugh PJ, Ridaura VK, Faith JJ, Rey FE, Knight R, Gordon JI. 2009. The effect  
946 of diet on the human gut microbiome: a metagenomic analysis in humanized gnotobiotic  
947 mice. *Sci Transl Med* 1:6ra14.
- 948 66. Görke B, Stülke J. 2008. Carbon catabolite repression in bacteria: many ways to  
949 make the most out of nutrients. *Nat Rev Microbiol* 6:613–624.
- 950 67. Hylemon PB, Phibbs PV. 1974. Evidence against the presence of cyclic AMP and  
951 related enzymes in selected strains of *Bacteroides fragilis*. *Biochem Biophys Res*  
952 *Commun* 60:88–95.
- 953 68. Barabote RD, Saier MH. 2005. Comparative genomic analyses of the bacterial  
954 phosphotransferase system. *Microbiol Mol Biol Rev* 69:608–634.
- 955 69. Brigham CJ, Malamy MH. 2005. Characterization of the RokA and HexA broad-  
956 substrate-specificity hexokinases from *Bacteroides fragilis* and their role in hexose and  
957 *N*-acetylglucosamine utilization. *J Bacteriol* 187:890–901.

- 958 70. Holmqvist E, Berggren S, Rizvanovic A. 2020. RNA-binding activity and regulatory  
959 functions of the emerging sRNA-binding protein ProQ. *Biochim Biophys Acta Gene*  
960 *Regul Mech* 1863:194596.
- 961 71. Kavita K, Mets F de, Gottesman S. 2018. New aspects of RNA-based regulation by  
962 Hfq and its partner sRNAs. *Curr Opin Microbiol* 42:53–61.
- 963 72. Olejniczak M, Storz G. 2017. ProQ/FinO-domain proteins: another ubiquitous family  
964 of RNA matchmakers? *Mol Microbiol* 104:905–915.
- 965 73. Updegrove TB, Zhang A, Storz G. 2016. Hfq: the flexible RNA matchmaker. *Curr*  
966 *Opin Microbiol* 30:133–138.
- 967 74. Coyne MJ, Reinap B, Lee MM, Comstock LE. 2005. Human symbionts use a host-  
968 like pathway for surface fucosylation. *Science* 307:1778–1781.
- 969 75. Porter NT, Canales P, Peterson DA, Martens EC. 2017. A subset of polysaccharide  
970 capsules in the human symbiont *Bacteroides thetaiotaomicron* promote increased  
971 competitive fitness in the mouse gut. *Cell Host Microbe* 22:494–506.
- 972 76. Bjursell MK, Martens EC, Gordon JI. 2006. Functional genomic and metabolic  
973 studies of the adaptations of a prominent adult human gut symbiont, *Bacteroides*  
974 *thetaiotaomicron*, to the suckling period. *J Biol Chem* 281:36269–36279.
- 975 77. Peterson DA, McNulty NP, Guruge JL, Gordon JI. 2007. IgA response to symbiotic  
976 bacteria as a mediator of gut homeostasis. *Cell Host Microbe* 2:328–339.

- 977 78. Goodman AL, McNulty NP, Zhao Y, Leip D, Mitra RD, Lozupone CA, Knight R,  
978 Gordon JI. 2009. Identifying genetic determinants needed to establish a human gut  
979 symbiont in its habitat. *Cell Host Microbe* 6:279–289.
- 980 79. Holdeman L, Cato E, Moore W. 1977. *Anaerobe laboratory manual*, 4th Edition.  
981 Anaerobe Laboratory, Virginia Polytechnic Institute and State University, Blacksburg,  
982 VA.
- 983 80. Koropatkin NM, Martens EC, Gordon JI, Smith TJ. 2008. Starch catabolism by a  
984 prominent human gut symbiont is directed by the recognition of amylose helices.  
985 *Structure* 16:1105–1115.
- 986 81. García-Bayona L, Comstock LE. 2019. Streamlined genetic manipulation of diverse  
987 *Bacteroides* and *Parabacteroides* isolates from the human gut microbiota. *mBio*  
988 10:e01762-19.
- 989 82. Wang J, Shoemaker NB, Wang GR, Salyers AA. 2000. Characterization of a  
990 *Bacteroides* mobilizable transposon, NBU2, which carries a functional lincomycin  
991 resistance gene. *J Bacteriol* 182:3559–3571.
- 992 83. Brown JR, Douady CJ, Italia MJ, Marshal WE, Stanhope MJ. 2001. Universal trees  
993 based on large combined protein sequence data sets. *Nat Genet* 28:281–285.
- 994 84. Edgar RC. 2004. MUSCLE: multiple sequence alignment with high accuracy and  
995 high throughput. *Nucleic Acids Res* 32:1792–1797.



- 996 85. Stamatakis A. 2014. RAxML version 8: a tool for phylogenetic analysis and post-  
997 analysis of large phylogenies. *Bioinformatics* 30:1312–1313.
- 998 86. Bolger AM, Lohse M, Usadel B. 2014. Trimmomatic: a flexible trimmer for Illumina  
999 sequence data. *Bioinformatics* 30:2114–2120.
- 1000 87. McClure R, Balasubramanian D, Sun Y, Bobrovskyy M, Sumbly P, Genco CA,  
1001 Vanderpool CK, Tjaden B. 2013. Computational analysis of bacterial RNA-Seq data.  
1002 *Nucleic Acids Res* 41:e140.
- 1003 88. Tjaden B. 2015. *De novo* assembly of bacterial transcriptomes from RNA-seq data.  
1004 *Genome Biol* 16:1–10.
- 1005 89. 1989. JMP® Version 15. SAS Institute Inc., Cary, NC.
- 1006 90. Ryder SP, Recht MI, Williamson JR. 2008. Quantitative analysis of protein–RNA  
1007 interactions by gel mobility shift. *Methods Mol Biol* 488:99–115.
- 1008 91. Morgan M, Anders S, Lawrence M, Aboyoun P, Pagès H, Gentleman R. 2009.  
1009 ShortRead: a bioconductor package for input, quality assessment and exploration of  
1010 high-throughput sequence data. *Bioinformatics* 25:2607–2608.
- 1011 92. Langmead B, Salzberg SL. 2012. Fast gapped-read alignment with Bowtie 2. *Nat*  
1012 *Methods* 9:357–359.
- 1013 93. Langmead B, Wilks C, Antonescu V, Charles R. 2018. Scaling read aligners to  
1014 hundreds of threads on general-purpose processors. *Bioinformatics* 35:421–432.
- 1015

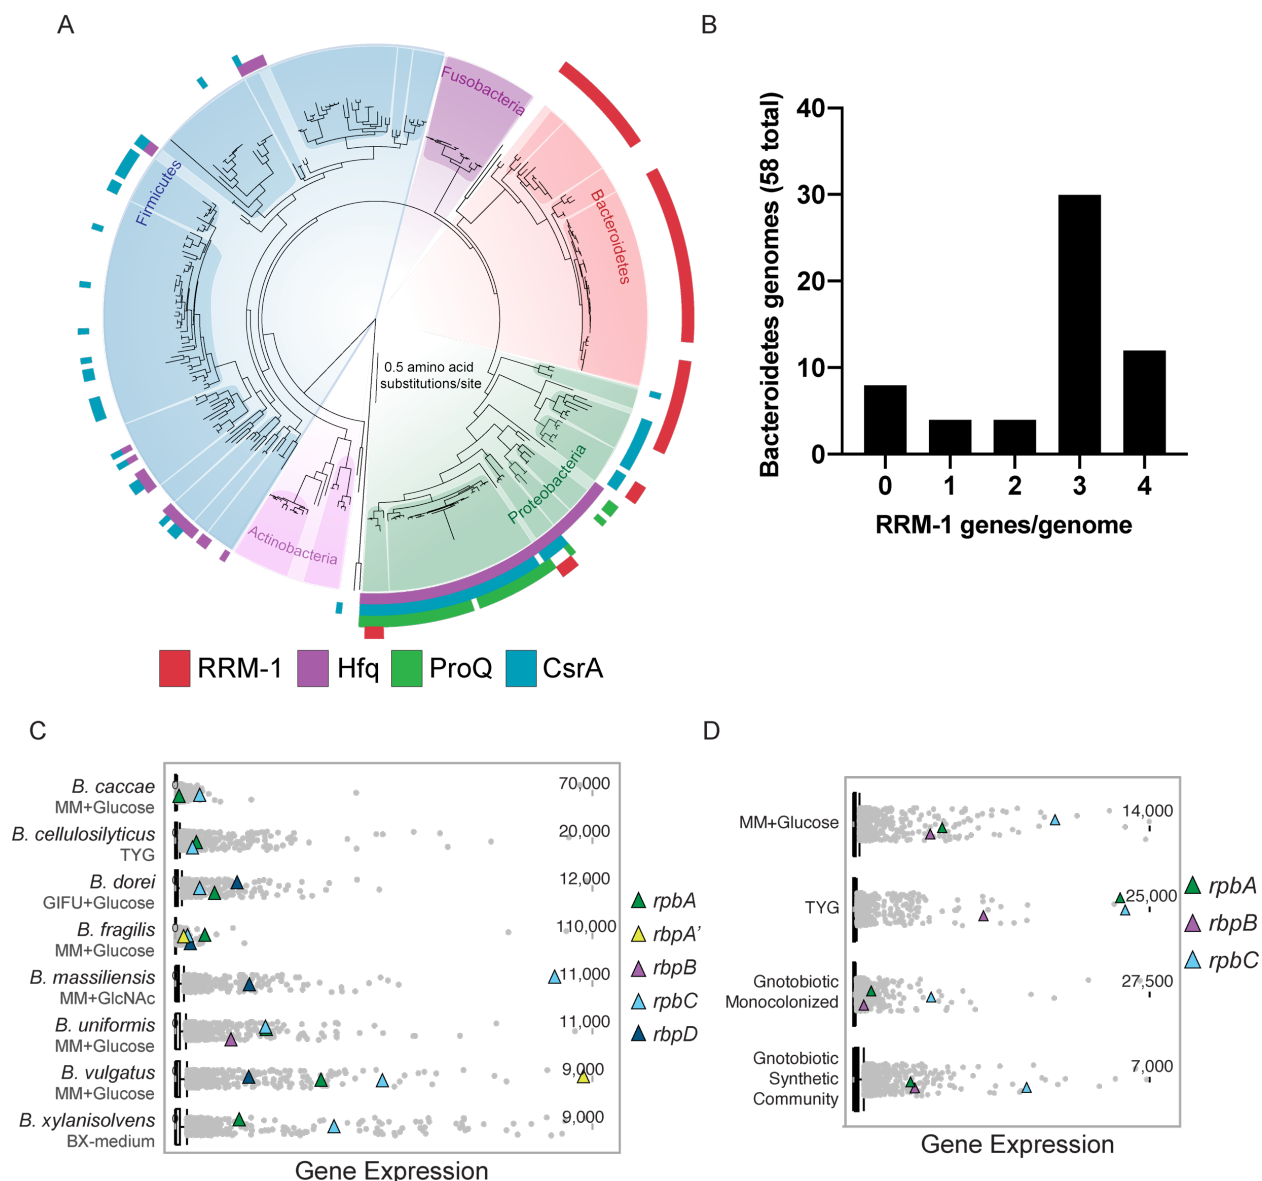

1016  
 1017 **Figure 1: RRM-1 is a conserved, abundantly expressed RNA-binding domain in**  
 1018 **gut bacteria.** (A) Maximum likelihood phylogenetic species tree of 313 human gut-  
 1019 associated microbial genomes. Colored bars indicate presence of at least one copy of  
 1020 the indicated RNA regulatory proteins in a given genome. (B) Histogram of total RRM-1  
 1021 genes per genome in the 58 Bacteroidetes genomes represented in (A). (C-D) RNA-seq  
 1022 expression plots of all genes in publicly available transcriptomes for various *Bacteroides*  
 1023 species (C) or *B. thetaiotaomicron* only in various growth conditions (D). Grey dots  
 1024 represent a single gene and triangles *rpb* genes. The top 10% of expressed genes lie  
 1025 above the whiskers.  
 1026

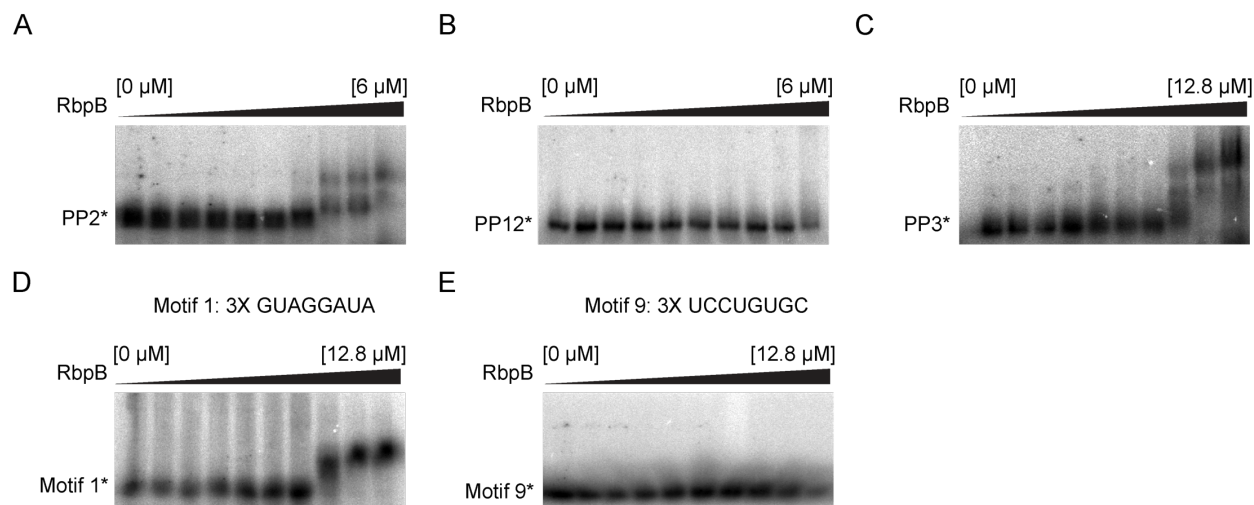

1027  
1028 **Figure 2: RbpB is a ssRNA-binding protein.** (A-B) RbpB-pentaprobe EMSAs for  
1029 pentaprobates 2 (A) and 12 (B) (PP2 and PP12, respectively). RbpB [ $\mu$ M] increases from  
1030 left to right as follows: 0, 0.02, 0.05, 0.09, 0.19, 0.38, 0.75, 1.50, 3.00, 6.00. (C)  
1031 Pentaprobe 3 repeat EMSA with RbpB [ $\mu$ M] increasing from left to right in the gel as  
1032 follows: 0, 0.05, 0.10, 0.20, 0.40, 0.80, 1.60, 3.20, 6.40, 12.80. (D-E) EMSAs of a 3x  
1033 repeat of MEME motif 1 (D) or motif 9 (E) with RbpB increasing from left to right as in  
1034 (C). Asterisk \* indicates the unbound radiolabeled pentaprobe.  
1035

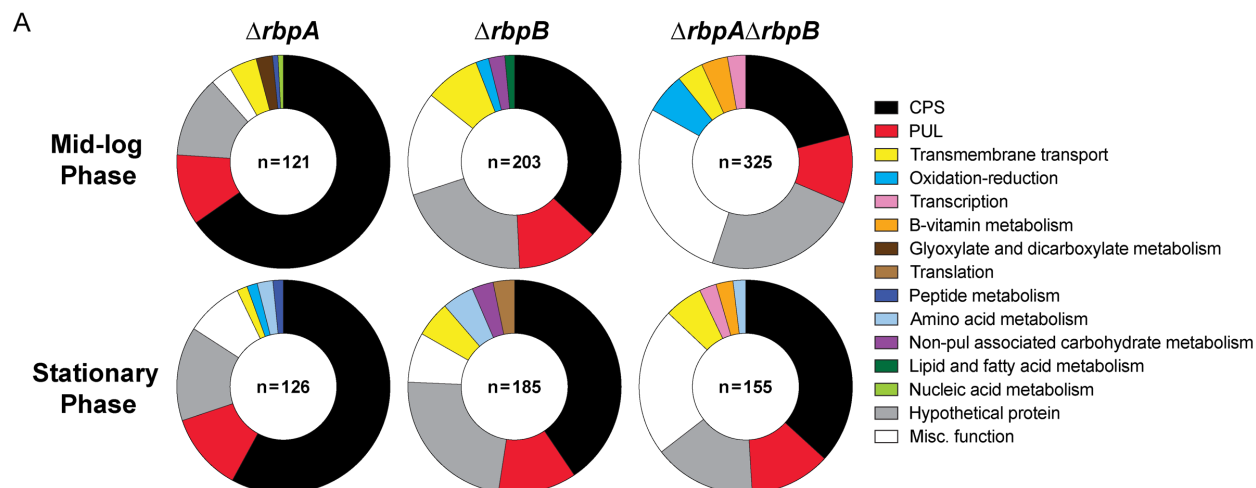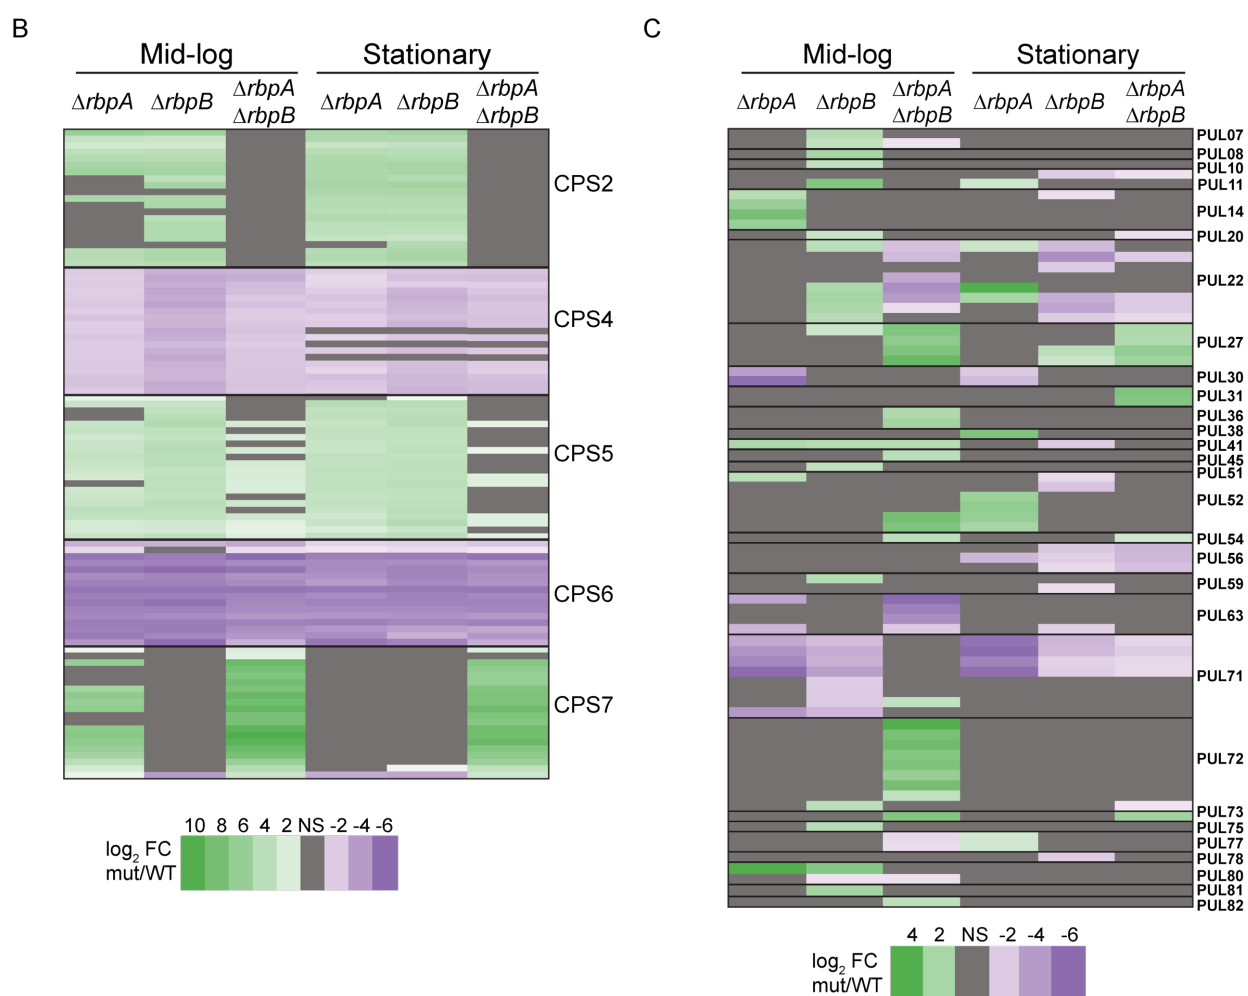

1036  
1037  
1038  
1039  
1040  
1041  
1042

**Figure 3: Loss of RBPs leads to altered expression of PULs and CPS loci.**  
(A) Functional categories enriched in differentially regulated genes in rich media RNA-sequencing (genes with a  $\log_2 FC \geq +1$  or  $\leq -1$  with a q-value  $< 0.06$ ). (B-C) Differentially regulated genes for PULs and CPS loci. Only genes that were significantly differentially regulated are shown. Gene names listed in Dataset S2A.

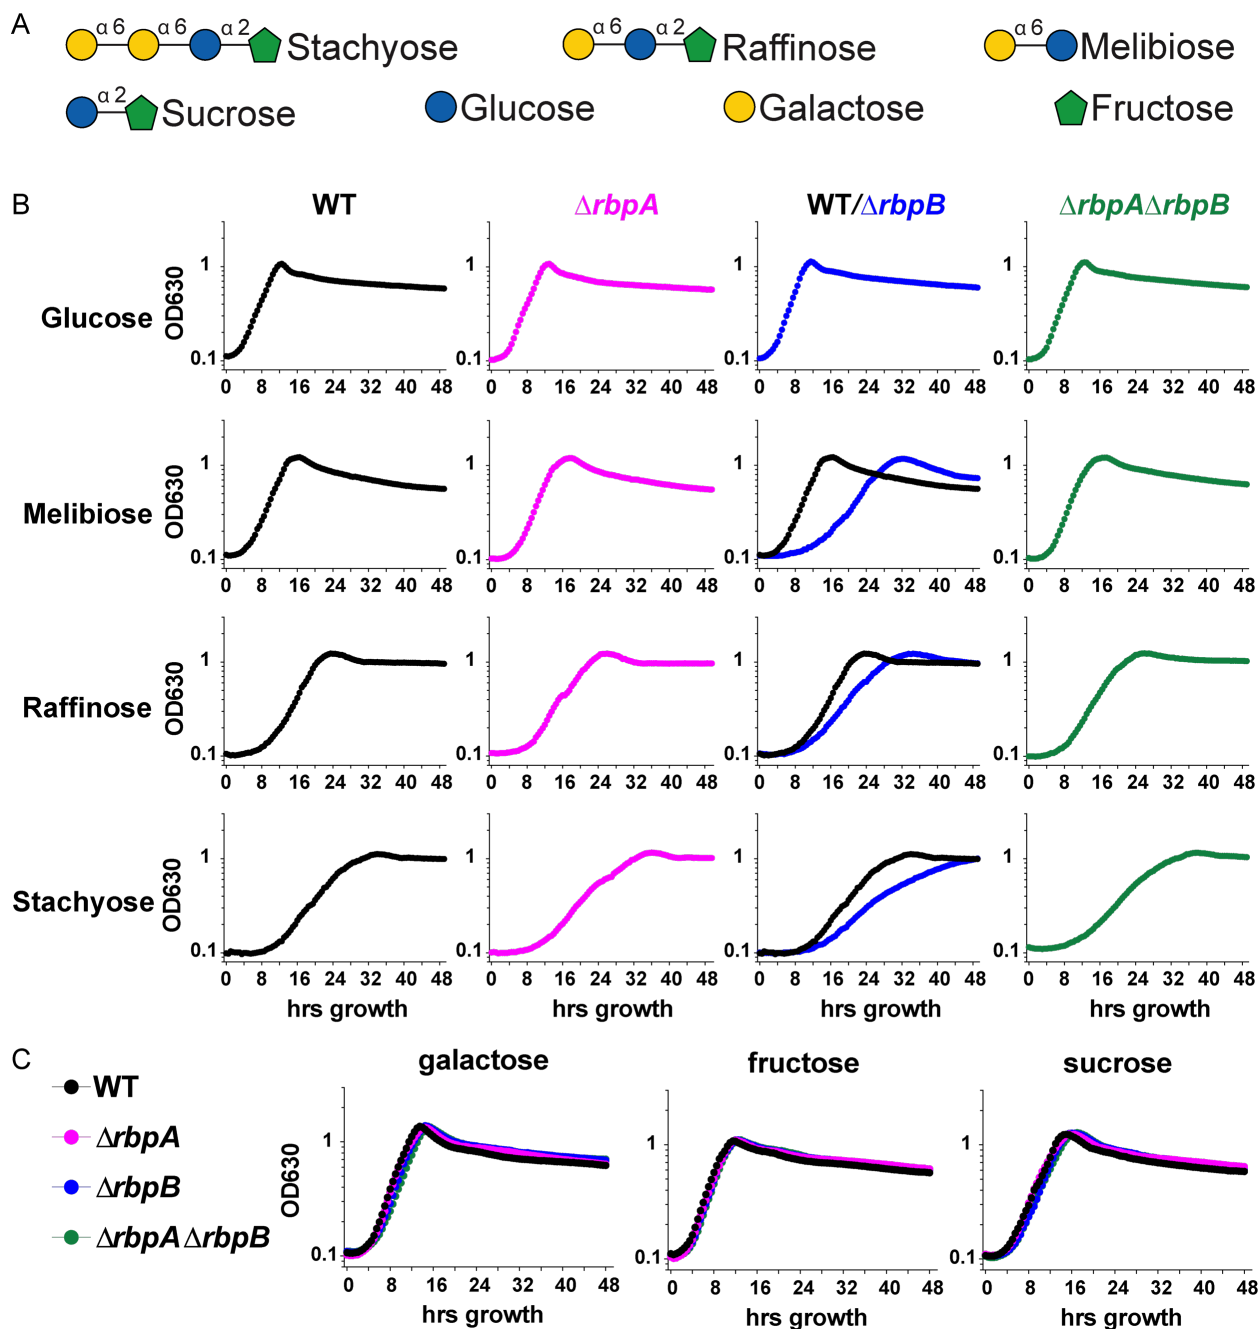

1043  
1044  
1045  
1046  
1047  
1048  
1049

**Figure 4:  $\Delta rbpB$  is defective for growth on raffinose family oligosaccharides.** (A) Raffinose family oligosaccharides and their subunits. (B-C) Representative normalized growth curves in minimal media from a single biological replicate ( $n=3$ ) for wild-type (WT) and  $rbp$  mutants with optical densities ( $OD_{630}$ ) recorded every 30 minutes.

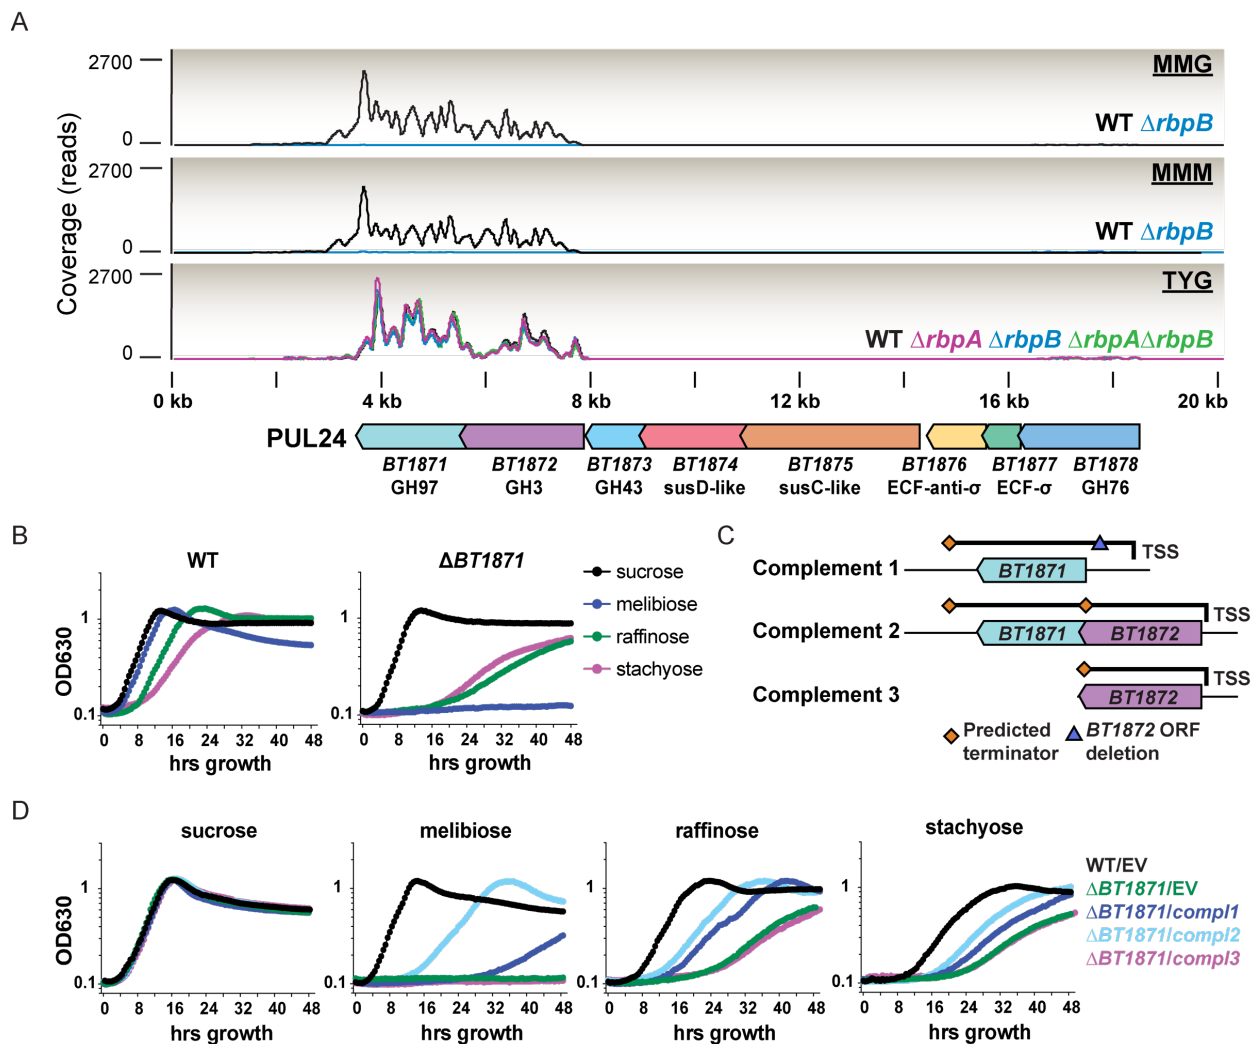

1050  
 1051 **Figure 5: Loss of *rbpB* leads to loss of expression of an essential melibiase in**  
 1052 **PUL24.** (A) Normalized expression coverage curves for mid-log phase cultures in  
 1053 PUL24 with putative gene annotations. (B and D) Representative growth curves in  
 1054 minimal media from a single biological replicate (n=3) with optical densities (OD<sub>630</sub>)  
 1055 recorded every 30 minutes. (C) Genomic regions inserted into pNBU2 vectors for  
 1056 complementation of *BT1871-BT1872* shown in (D). (D) Empty vector (EV) controls  
 1057 contain integrated pNBU2 without an insert.

1058

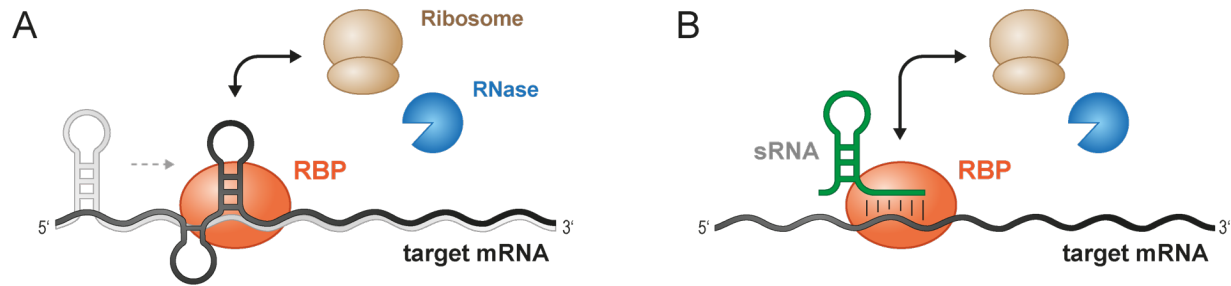

1059

1060

**Figure 6: Model for possible mechanisms of RBP-mediated regulation**

1061

(A) RBP binding directly to mRNAs could promote structural changes (represented by the transition from light gray to dark gray conformation) that alters access of ribosomes

1062

or RNases to change translation or mRNA stability. (B) RBPs could facilitate sRNA

1063

binding to mRNA targets and alter access of ribosomes or RNases to change

1064

translation or mRNA stability.

1065
